# Supplementary material for: Antibiotic exposure enriches streptococci carrying resistance genes in periodontitis plaque biofilms
Source: PeerJ. 2025 Jan 20;13:e18835. doi: 10.7717/peerj.18835 (PMC11756365; doi:10.7717/peerj.18835)
Supplement: Supplemental Information 2 [file peerj-13-18835-s002.xls]

## Sheet: Sheet1
Table S2 Metagenomic sample list from public database
BioProject	SRA accession	health status	Sampling site	Reads count(#)
PRJNA741688	SRR15001307	healthy	saliva	83193868
PRJNA741688	SRR15001308	healthy	saliva	77569396
PRJNA741688	SRR15001309	healthy	saliva	75598312
PRJNA741688	SRR15001310	healthy	saliva	77508130
PRJNA741688	SRR15001319	healthy	saliva	80569578
PRJNA741688	SRR15001320	healthy	saliva	81820866
PRJNA230363	SRR2037087	healthy	saliva	35732226
PRJNA230363	SRR2037088	healthy	saliva	94503552
PRJNA230363	SRR2037089	healthy	saliva	222827944
PRJNA230363	SRR2037090	healthy	saliva	229910704
PRJNA230363	SRR2037091	healthy	saliva	39440516
PRJNA741688	SRR15001303	periodontitis	saliva	78025316
PRJNA741688	SRR15001304	periodontitis	saliva	75790690
PRJNA741688	SRR15001305	periodontitis	saliva	119194488
PRJNA741688	SRR15001306	periodontitis	saliva	79368758
PRJNA741688	SRR15001311	periodontitis	saliva	87792368
PRJNA741688	SRR15001312	periodontitis	saliva	83083908
PRJNA741688	SRR15001313	periodontitis	saliva	74260562
PRJNA741688	SRR15001314	periodontitis	saliva	76629884
PRJNA741688	SRR15001315	periodontitis	saliva	78788086
PRJNA741688	SRR15001316	periodontitis	saliva	78669706
PRJNA741688	SRR15001317	periodontitis	saliva	74618136
PRJNA741688	SRR15001318	periodontitis	saliva	77793184
PRJNA396840	SRR5892193	periodontitis	saliva	10647294
PRJNA396840	SRR5892194	periodontitis	saliva	6258030
PRJNA396840	SRR5892196	periodontitis	saliva	7787328
PRJNA396840	SRR5892197	periodontitis	saliva	2940576
PRJNA396840	SRR5892198	periodontitis	saliva	9813916
PRJNA396840	SRR5892199	periodontitis	saliva	4899960
PRJNA396840	SRR5892201	periodontitis	saliva	4882210
PRJNA396840	SRR5892202	periodontitis	saliva	4950934
PRJNA396840	SRR5892203	periodontitis	saliva	3130690
PRJNA396840	SRR5892206	periodontitis	saliva	3657842
PRJNA396840	SRR5892208	periodontitis	saliva	3370786
PRJNA396840	SRR5892209	periodontitis	saliva	8975816
PRJNA396840	SRR5892210	periodontitis	saliva	12037902
PRJNA396840	SRR5892211	periodontitis	saliva	7759494
PRJNA396840	SRR5892212	periodontitis	saliva	3323092
PRJNA396840	SRR5892213	periodontitis	saliva	8550254
PRJNA396840	SRR5892214	periodontitis	saliva	9257802
PRJNA396840	SRR5892215	periodontitis	saliva	12425918
PRJNA396840	SRR5892216	periodontitis	saliva	14434618
PRJNA396840	SRR5892217	periodontitis	saliva	6096682
PRJEB42701	ERR5383528	periodontitis	saliva	40823338
PRJEB42701	ERR5383531	periodontitis	saliva	46723008
PRJEB42701	ERR5383532	periodontitis	saliva	30104422
PRJEB42701	ERR5383534	periodontitis	saliva	33303580
PRJEB42701	ERR5384476	periodontitis	saliva	36375268
PRJEB42701	ERR5384527	periodontitis	saliva	46979588
PRJEB42701	ERR5384690	periodontitis	saliva	37901636
PRJEB42701	ERR5385017	periodontitis	saliva	35594796
PRJEB42701	ERR5385035	periodontitis	saliva	34956926
PRJEB42701	ERR5385042	periodontitis	saliva	36554766
PRJEB42701	ERR5385085	periodontitis	saliva	32485308
PRJEB42701	ERR5385087	periodontitis	saliva	38321614
PRJEB42701	ERR5385088	periodontitis	saliva	57641882
PRJEB42701	ERR5385092	periodontitis	saliva	39159620
PRJEB42701	ERR5385093	periodontitis	saliva	42389118
PRJNA78025	SRR653444	healthy	plaque	12504058
PRJNA78025	SRR653445	healthy	plaque	1130070
PRJNA78025	SRR653447	healthy	plaque	3683652
PRJNA78025	SRR653448	healthy	plaque	4593298
PRJNA78025	SRR653451	healthy	plaque	487310
PRJNA78025	SRR653452	healthy	plaque	501442
PRJNA528558	SRR8786264	healthy	plaque	30834978
PRJNA528558	SRR8786265	healthy	plaque	30407662
PRJNA528558	SRR8786267	healthy	plaque	30748896
PRJNA508385	SRR9641788	healthy	plaque	1831606
PRJNA508385	SRR9641789	healthy	plaque	4376658
PRJNA508385	SRR9641790	healthy	plaque	2881482
PRJNA508385	SRR9641791	healthy	plaque	2600836
PRJNA508385	SRR9641792	healthy	plaque	2745754
PRJNA508385	SRR9641793	healthy	plaque	3675050
PRJNA508385	SRR9641794	healthy	plaque	2860504
PRJNA508385	SRR9641795	healthy	plaque	3004178
PRJNA508385	SRR9641796	healthy	plaque	3560200
PRJNA508385	SRR9641797	healthy	plaque	2334364
PRJNA508385	SRR9641798	healthy	plaque	2367130
PRJNA508385	SRR9641799	healthy	plaque	3216546
PRJNA508385	SRR9641800	healthy	plaque	3073714
PRJNA508385	SRR9641801	healthy	plaque	2599898
PRJNA508385	SRR9641802	healthy	plaque	2650630
PRJNA508385	SRR9641803	healthy	plaque	2579390
PRJNA508385	SRR9641804	healthy	plaque	3322750
PRJNA508385	SRR9641805	healthy	plaque	1941224
PRJNA508385	SRR9641806	healthy	plaque	3730134
PRJNA508385	SRR9641807	healthy	plaque	2195438
PRJNA508385	SRR9641808	healthy	plaque	1962534
PRJNA508385	SRR9641809	healthy	plaque	2987446
PRJNA508385	SRR9641810	healthy	plaque	4715914
PRJNA508385	SRR9641811	healthy	plaque	3414446
PRJNA508385	SRR9641812	healthy	plaque	3917774
PRJNA255922	SRR10276558	healthy	plaque	26003180
PRJNA255922	SRR10276559	healthy	plaque	23854744
PRJNA255922	SRR10276560	healthy	plaque	9266032
PRJNA255922	SRR10276561	healthy	plaque	26827034
PRJNA255922	SRR10276562	healthy	plaque	8026930
PRJNA255922	SRR10276563	healthy	plaque	17083308
PRJNA255922	SRR10276564	healthy	plaque	6676474
PRJNA255922	SRR10276565	healthy	plaque	1801032
PRJNA255922	SRR10276566	healthy	plaque	31749888
PRJNA255922	SRR10276567	healthy	plaque	6135160
PRJNA255922	SRR10276568	healthy	plaque	2388296
PRJNA255922	SRR10276569	healthy	plaque	26541204
PRJNA255922	SRR10276570	healthy	plaque	25122704
PRJNA255922	SRR10276571	healthy	plaque	15939814
PRJNA255922	SRR10276572	healthy	plaque	27687256
PRJNA255922	SRR10276573	healthy	plaque	10500958
PRJNA255922	SRR10276574	healthy	plaque	17277636
PRJNA255922	SRR10276575	healthy	plaque	25871498
PRJNA255922	SRR10276576	healthy	plaque	27283762
PRJNA255922	SRR10276577	healthy	plaque	9801998
PRJNA255922	SRR10276578	healthy	plaque	10662198
PRJNA255922	SRR10276579	healthy	plaque	37872660
PRJNA255922	SRR10276580	healthy	plaque	7517036
PRJNA255922	SRR10276581	healthy	plaque	24342880
PRJNA255922	SRR10276582	healthy	plaque	9948702
PRJNA255922	SRR10276583	healthy	plaque	17561572
PRJNA255922	SRR10276584	healthy	plaque	14433704
PRJNA255922	SRR10276585	healthy	plaque	7650468
PRJNA255922	SRR10276586	healthy	plaque	38461650
PRJNA255922	SRR10276589	healthy	plaque	25285772
PRJNA255922	SRR10276590	healthy	plaque	21320148
PRJNA255922	SRR10276591	healthy	plaque	8271732
PRJNA255922	SRR10276592	healthy	plaque	22964524
PRJNA255922	SRR10276593	healthy	plaque	18019732
PRJNA255922	SRR10276594	healthy	plaque	9526194
PRJNA255922	SRR10276595	healthy	plaque	21843574
PRJNA255922	SRR10276596	healthy	plaque	35103376
PRJNA255922	SRR10276597	healthy	plaque	7632868
PRJNA255922	SRR10276598	healthy	plaque	28381010
PRJNA255922	SRR10276599	healthy	plaque	25591830
PRJNA255922	SRR10276600	healthy	plaque	18244242
PRJNA255922	SRR10276601	healthy	plaque	43171906
PRJNA255922	SRR10276602	healthy	plaque	44031606
PRJNA255922	SRR10276603	healthy	plaque	27288286
PRJNA255922	SRR10276604	healthy	plaque	26906164
PRJNA230363	SRR1045092	healthy	plaque	9792960
PRJNA230363	SRR1045093	healthy	plaque	10574606
PRJNA230363	SRR1045094	healthy	plaque	8892556
PRJNA230363	SRR1045095	healthy	plaque	8122434
PRJNA230363	SRR1045096	healthy	plaque	11931698
PRJNA230363	SRR1045097	healthy	plaque	15200260
PRJNA230363	SRR2034640	healthy	plaque	15275976
PRJNA78025	SRR651965	periodontitis	plaque	7258054
PRJNA78025	SRR653183	periodontitis	plaque	8377084
PRJNA78025	SRR653184	periodontitis	plaque	1081120
PRJNA78025	SRR653185	periodontitis	plaque	1194120
PRJNA78025	SRR653413	periodontitis	plaque	6674292
PRJNA78025	SRR653414	periodontitis	plaque	7435332
PRJNA78025	SRR653417	periodontitis	plaque	957254
PRJNA78025	SRR653418	periodontitis	plaque	697236
PRJNA552294	SRR9684942	periodontitis	plaque	17511628
PRJNA552294	SRR9684943	periodontitis	plaque	18511342
PRJNA552294	SRR9684944	periodontitis	plaque	16759526
PRJNA552294	SRR9684945	periodontitis	plaque	17315650
PRJNA552294	SRR9684946	periodontitis	plaque	13185154
PRJNA552294	SRR9684947	periodontitis	plaque	16183864
PRJNA552294	SRR9684948	periodontitis	plaque	11003934
PRJNA552294	SRR9684949	periodontitis	plaque	17521580
PRJNA552294	SRR9684950	periodontitis	plaque	11773378
PRJNA552294	SRR9684951	periodontitis	plaque	17786822
PRJNA552294	SRR9684952	periodontitis	plaque	13352218
PRJNA552294	SRR9684953	periodontitis	plaque	13453786
PRJNA552294	SRR9684954	periodontitis	plaque	12262904
PRJNA552294	SRR9684955	periodontitis	plaque	12279870
PRJNA552294	SRR9684956	periodontitis	plaque	12772938
PRJNA552294	SRR9684957	periodontitis	plaque	10797762
PRJNA552294	SRR9684958	periodontitis	plaque	13572596
PRJNA552294	SRR9684959	periodontitis	plaque	11128322
PRJNA552294	SRR9684960	periodontitis	plaque	11982688
PRJNA552294	SRR9684961	periodontitis	plaque	12529208
PRJNA552294	SRR9684962	periodontitis	plaque	13647746
PRJNA552294	SRR9684963	periodontitis	plaque	16816618
PRJNA552294	SRR9684964	periodontitis	plaque	13282698
PRJNA552294	SRR9684965	periodontitis	plaque	18947852
PRJNA552294	SRR9684966	periodontitis	plaque	11605262
PRJNA552294	SRR9684967	periodontitis	plaque	12532028
PRJNA552294	SRR9684968	periodontitis	plaque	18163292
PRJNA552294	SRR9684969	periodontitis	plaque	12700702
PRJNA552294	SRR9684970	periodontitis	plaque	10514016
PRJNA552294	SRR9684971	periodontitis	plaque	15892370
PRJNA552294	SRR9684972	periodontitis	plaque	11497702
PRJNA552294	SRR9684973	periodontitis	plaque	21599716
PRJNA552294	SRR9684974	periodontitis	plaque	17883006
PRJNA552294	SRR9684975	periodontitis	plaque	22516062
PRJNA552294	SRR9684976	periodontitis	plaque	20618842
PRJNA552294	SRR9684977	periodontitis	plaque	16898722
PRJNA552294	SRR9684978	periodontitis	plaque	17035472
PRJNA552294	SRR9684979	periodontitis	plaque	19128266
PRJNA552294	SRR9684980	periodontitis	plaque	25664146
PRJNA552294	SRR9684981	periodontitis	plaque	7152130
PRJNA552294	SRR9684982	periodontitis	plaque	20701570
PRJNA552294	SRR9684983	periodontitis	plaque	18423716
PRJNA552294	SRR9684984	periodontitis	plaque	13518918
PRJNA552294	SRR9684985	periodontitis	plaque	12368996
PRJNA552294	SRR9684986	periodontitis	plaque	12882342
PRJNA552294	SRR9684987	periodontitis	plaque	15799976
PRJNA552294	SRR9684988	periodontitis	plaque	18095692
PRJNA552294	SRR9684989	periodontitis	plaque	11052680
PRJNA552294	SRR9684990	periodontitis	plaque	10891084
PRJNA552294	SRR9684991	periodontitis	plaque	10554602
PRJNA552294	SRR9684992	periodontitis	plaque	12095734
PRJNA552294	SRR9684993	periodontitis	plaque	13478846
PRJNA552294	SRR9684994	periodontitis	plaque	21662242
PRJNA552294	SRR9684995	periodontitis	plaque	16663284
PRJNA552294	SRR9684996	periodontitis	plaque	13013866
PRJNA552294	SRR9684997	periodontitis	plaque	20423422
PRJNA552294	SRR9684998	periodontitis	plaque	17329788
PRJNA552294	SRR9684999	periodontitis	plaque	20454882
PRJNA552294	SRR9685000	periodontitis	plaque	12496652
PRJNA552294	SRR9685001	periodontitis	plaque	12141426
PRJNA552294	SRR9685002	periodontitis	plaque	12356982
PRJNA552294	SRR9685003	periodontitis	plaque	11724518
PRJNA552294	SRR9685004	periodontitis	plaque	12684294
PRJNA552294	SRR9685005	periodontitis	plaque	12492568
PRJNA552294	SRR9685006	periodontitis	plaque	12142766
PRJNA552294	SRR9685007	periodontitis	plaque	16370804
PRJNA552294	SRR9685008	periodontitis	plaque	13402952
PRJNA552294	SRR9685009	periodontitis	plaque	13565222
PRJNA528558	SRR8786260	periodontitis	plaque	30825240
PRJNA528558	SRR8786261	periodontitis	plaque	30912934
PRJNA528558	SRR8786262	periodontitis	plaque	30633470
PRJNA528558	SRR8786263	periodontitis	plaque	29988486
PRJNA528558	SRR8786266	periodontitis	plaque	28753246
PRJNA528558	SRR8786268	periodontitis	plaque	29782530
PRJNA255922	SRR1779378	periodontitis	plaque	47677480
PRJNA255922	SRR1779403	periodontitis	plaque	68198196
PRJNA255922	SRR1779468	periodontitis	plaque	12639030
PRJNA255922	SRR1779479	periodontitis	plaque	17622330
PRJNA255922	SRR1779482	periodontitis	plaque	13771922
PRJNA255922	SRR1779488	periodontitis	plaque	40492790
PRJNA255922	SRR1779492	periodontitis	plaque	22751752
PRJNA255922	SRR1779495	periodontitis	plaque	7039766
PRJNA255922	SRR1779497	periodontitis	plaque	50132572
PRJNA255922	SRR1779502	periodontitis	plaque	56218562
PRJNA255922	SRR1779506	periodontitis	plaque	25668576
PRJNA255922	SRR1779511	periodontitis	plaque	6939962
PRJNA255922	SRR1781914	periodontitis	plaque	57873198
PRJNA255922	SRR1781969	periodontitis	plaque	39124116
PRJNA255922	SRR1781970	periodontitis	plaque	9407334
PRJNA255922	SRR1781983	periodontitis	plaque	55459404
PRJNA255922	SRR1783028	periodontitis	plaque	40639486
PRJNA255922	SRR1783032	periodontitis	plaque	22257874
PRJNA255922	SRR1783079	periodontitis	plaque	57182684
PRJNA255922	SRR1783718	periodontitis	plaque	31813530
PRJNA255922	SRR1783722	periodontitis	plaque	17267402
PRJNA255922	SRR1783724	periodontitis	plaque	44928046
PRJNA255922	SRR1783757	periodontitis	plaque	49870904
PRJNA255922	SRR1783758	periodontitis	plaque	72980664
PRJNA255922	SRR1783760	periodontitis	plaque	25785142
PRJNA255922	SRR1783763	periodontitis	plaque	15215256
PRJNA255922	SRR1783767	periodontitis	plaque	67791904
PRJNA255922	SRR1783768	periodontitis	plaque	13035620
PRJNA255922	SRR1783769	periodontitis	plaque	46150292
PRJNA255922	SRR1783771	periodontitis	plaque	22832140
PRJNA255922	SRR1783774	periodontitis	plaque	61285758
PRJNA255922	SRR1783775	periodontitis	plaque	42480598
PRJNA255922	SRR1794083	periodontitis	plaque	92621186
PRJNA255922	SRR1794618	periodontitis	plaque	86702108
PRJNA255922	SRR1794621	periodontitis	plaque	11658042
PRJNA255922	SRR1794623	periodontitis	plaque	32965038
PRJNA255922	SRR1794794	periodontitis	plaque	18818890
PRJNA255922	SRR1795007	periodontitis	plaque	64819738
PRJNA255922	SRR1795008	periodontitis	plaque	56106866
PRJNA255922	SRR1795009	periodontitis	plaque	66035244
PRJNA255922	SRR1795012	periodontitis	plaque	15578194
PRJNA255922	SRR1795016	periodontitis	plaque	31778656
PRJNA255922	SRR1795017	periodontitis	plaque	22208152
PRJNA255922	SRR1795018	periodontitis	plaque	69712256
PRJNA255922	SRR1795019	periodontitis	plaque	53684366
PRJNA255922	SRR1795020	periodontitis	plaque	35702656
PRJNA255922	SRR1795229	periodontitis	plaque	61815416
PRJNA255922	SRR1795230	periodontitis	plaque	60706608
PRJNA230363	SRR1044006	periodontitis	plaque	18519330
PRJNA230363	SRR1044017	periodontitis	plaque	7600298
PRJNA230363	SRR1044032	periodontitis	plaque	8313926
PRJNA230363	SRR1044033	periodontitis	plaque	11841736
PRJNA230363	SRR1044034	periodontitis	plaque	13307752
PRJNA230363	SRR2034637	periodontitis	plaque	8073004
PRJNA230363	SRR2034638	periodontitis	plaque	11569812
PRJNA230363	SRR2034639	periodontitis	plaque	18265188
PRJEB42701	ERR5383527	periodontitis	plaque	34757522
PRJEB42701	ERR5383529	periodontitis	plaque	43636626
PRJEB42701	ERR5383530	periodontitis	plaque	38503096
PRJEB42701	ERR5383533	periodontitis	plaque	32641620
PRJEB42701	ERR5384453	periodontitis	plaque	47549678
PRJEB42701	ERR5384454	periodontitis	plaque	38478304
PRJEB42701	ERR5384455	periodontitis	plaque	39484650
PRJEB42701	ERR5384745	periodontitis	plaque	34258268
PRJEB42701	ERR5385013	periodontitis	plaque	37053446
PRJEB42701	ERR5385032	periodontitis	plaque	34632986
PRJEB42701	ERR5385033	periodontitis	plaque	41662314
PRJEB42701	ERR5385034	periodontitis	plaque	42403088
PRJEB42701	ERR5385043	periodontitis	plaque	40204168
PRJEB42701	ERR5385062	periodontitis	plaque	41629322
PRJEB42701	ERR5385081	periodontitis	plaque	53357040
PRJEB42701	ERR5385082	periodontitis	plaque	37345020
PRJEB42701	ERR5385083	periodontitis	plaque	47736100
PRJEB42701	ERR5385084	periodontitis	plaque	37330962
PRJEB42701	ERR5385086	periodontitis	plaque	34060904
PRJEB42701	ERR5385089	periodontitis	plaque	44636382
PRJEB42701	ERR5385090	periodontitis	plaque	37329238
PRJEB42701	ERR5385091	periodontitis	plaque	33093792
