# Supplementary material for: Antibiotic exposure enriches streptococci carrying resistance genes in periodontitis plaque biofilms
Source: PeerJ. 2025 Jan 20;13:e18835. doi: 10.7717/peerj.18835 (PMC11756365; doi:10.7717/peerj.18835)
Supplement: Supplemental Information 4 [file peerj-13-18835-s004.xlsx]

## Sheet: Table S5
# Constructed from biom file
#OTU ID	H1.jia	H1.ke	H1.yuan	H2.jia	H2.ke	H2.si	H2.yuan	H3.jia	H3.ke	H3.si	H3.yuan	H4.jia	H4.ke	H4.yuan	H5.jia	H5.ke	H5.si	H5.yuan	H6.jia	H6.ke	H6.yuan	H7.jia	H7.ke	H7.yuan	H8.jia	H8.ke	H8.si	H8.yuan	H9.jia	H9.ke	H9.yuan	H10.jia	H10.si	H10.yuan	H11.yuan	P1.a	P1.jia	P1.ke	P1.si	P1.yuan	P2.a	P2.jia	P2.ke	P2.si	P2.yuan	P3.a	P3.jia	P3.ke	P3.si
k__Archaea;Other;Other;Other;Other;Other	0	0	0	0	0	0	0	0	0	0	0	0	0	0	0	0	0	0	0	0	0	0	0	0	0	0	0	0	0	0	0	0	0	0	0	0	0	0	0	0	0	0	0	1.81435517817e-05	0	0	0	0	0
k__Archaea;p__Euryarchaeota;c__Halobacteria;o__Halobacteriales;f__Halobacteriaceae;g__Halococcus	0	0	0	0	0	0	0	0	0	0	0	0	0	0	0	0	0	0	0	0	0	0	0	0	0	0	0	0	0	0	0	0	0	0	0	0	0	0	0	0	0	0	0	0	0	0	0	0	0
k__Archaea;p__Euryarchaeota;c__Methanobacteria;o__Methanobacteriales;f__Methanobacteriaceae;g__Methanobrevibacter	0	0	0	0	0	0	0	0	0	0	0	0	0	0	0	0	0	0	0	0	0	0	0	0	0	0	0	0	0	0	0	0	0	0	0	0	0	0	0	0	0	0	0	0	0	0	0	1.74562720385e-05	0
k__Bacteria;Other;Other;Other;Other;Other	0	0	1.94208696665e-05	0	4.07930162356e-05	6.59529096225e-05	2.03911013234e-05	0	0	0	0	0.000465700170082	0	0	0	0	0	0	0	0	1.61316341345e-05	0	0	0	0	0	0	1.76625395199e-05	0	0	0	0	2.70102368798e-05	0	0	4.585788641e-05	0	5.144650421e-05	3.7853695467e-05	1.81244789212e-05	0	0	0	3.62871035634e-05	0	1.68007929974e-05	0	1.74562720385e-05	0
k__Bacteria;p__Acidobacteria;c__Acidobacteria-6;o__iii1-15;f__RB40;g__	0	0	0	0	0	0	0	0	0	0	0	0	0	0	0	0	0	0	0	0	0	0	0	0	0	0	0	0	5.05957651345e-05	0	0	0	0	0	0	0	0	0	0	0	0	0	0	0	0	0	0	0	0
k__Bacteria;p__Acidobacteria;c__Acidobacteriia;o__Acidobacteriales;f__Koribacteraceae;g__Candidatus Koribacter	0	0	0	0	0	0	0	0	0	0	0	0	0	0	0	0	0	0	0	0	0	0	0	0	0	0	0	0	0	0	0	0	0	0	1.92596587188e-05	0	0	0	0	0	0	0	0	0	0	0	0	0	0
k__Bacteria;p__Acidobacteria;c__S035;o__;f__;g__	0	0	0	0	0	0	0	0	0	0	0	0	0	0	0	0	0	0	0	0	0	0	0	0	0	0	0	0	2.52978825672e-05	0	0	0	0	0	0	0	0	0	0	0	0	0	0	0	0	0	0	0	0
k__Bacteria;p__Acidobacteria;c__[Chloracidobacteria];o__RB41;f__;g__	0	0	0	0	0	0	0	0	0	0	0	0	0	0	0	0	0	0	0	0	0	0	0	0	0	0	0	0	2.52978825672e-05	0	0	0	0	0	0	0	0	0	0	0	0	0	0	0	0	0	0	0	0
k__Bacteria;p__Actinobacteria;Other;Other;Other;Other	0	0	0	0	0	0	0	0	0	0	0	0	0	0	0	0	0	0	0	0	0	0	0	0	0	0	0	0	0	0	0	0	0	0	0	0	0	0	0	0	0	0	0	0	0	0	0	0	0
k__Bacteria;p__Actinobacteria;c__Acidimicrobiia;o__Acidimicrobiales;f__;g__	0	1.99409747148e-05	0	0	0	0	0	0	0	0	0	0	0	0	0	0	0	0	0	0	0	0	0	0	0	0	0	0	0	0	0	0	0	0	0	0	0	0	0	0	0	0	0	0	0	0	0	0	0
k__Bacteria;p__Actinobacteria;c__Actinobacteria;Other;Other;Other	0	0	0	0	0	0	0	0	0	0	0	6.07435004455e-05	0	0	0	0	0	0	0	0	0	0	0	0	0	0	0	0	0	0	0	0	0	0	0	0	0	0	0	0	0	0	0	0	0	0	0	0	0
k__Bacteria;p__Actinobacteria;c__Actinobacteria;o__Actinomycetales;Other;Other	0	0	0	0	0	0	0	0	0	0	0	0.00184255284685	0	0	0	0	0	2.47157686604e-05	0	0	0	3.21848698927e-05	0	1.59708691347e-05	0	0	0	0	0.000379468238508	0	0	0	0	0	0	0	0	0	0	0	0	0	0	0	0	0	0	0	0
k__Bacteria;p__Actinobacteria;c__Actinobacteria;o__Actinomycetales;f__Actinomycetaceae;Other	0	0	0	0	0	0	0	0	0	0	0	0.000323965335709	0	0	0	0	0	0	0	0	0	0	0	0	0	0	0	0	0	0	0	0	0	0	0	0	0	0	0	0	0	0	0	0	0	0	0	0	0
k__Bacteria;p__Actinobacteria;c__Actinobacteria;o__Actinomycetales;f__Actinomycetaceae;g__	1.7134730385e-05	1.99409747148e-05	0	0	0	0	0	4.92319810949e-05	0	0	0	0	0	0	0	1.69857150137e-05	0	0	0	1.63792115048e-05	0	0	2.45960105271e-05	1.59708691347e-05	1.96741953254e-05	2.82182967436e-05	4.25332822934e-05	3.53250790399e-05	0	0	0	1.95936281521e-05	2.70102368798e-05	6.45536117746e-05	0	0	3.48711510967e-05	1.71488347367e-05	0	1.81244789212e-05	0.000173516434485	0.000765425184355	0	0	0.000358329532869	1.68007929974e-05	0.00020202020202	0	0
k__Bacteria;p__Actinobacteria;c__Actinobacteria;o__Actinomycetales;f__Actinomycetaceae;g__Actinomyces	0.00827607477596	0	9.71043483327e-05	0.00773321315908	0.000571102227299	0	0.0176587	0.0375804122358	0.0242108299679	1.60264115262e-05	0.0616456580304	0.689176	1.88040616773e-05	0.00159145163124	0.0016762310438	1.69857150137e-05	2.33765019402e-05	0.0349728126545	0.0236891906935	3.27584230095e-05	0.00624294241007	0.00677491511241	0	0.0223751876577	0.00306917447076	0.0205429200293	4.25332822934e-05	0.0164438242931	0.996357	0.000192321561651	0.00790320609443	3.91872563042e-05	2.70102368798e-05	0.000344285929464	1.92596587188e-05	9.171577282e-05	0.0174355755483	0.000788846397887	1.89268477335e-05	0.0087903722768	0.000470973179317	0.0147110986652	0.000148024794153	0	0.00141703042543	0.00119285630282	0.0025974025974	0.00633662674999	0.000299466948831
k__Bacteria;p__Actinobacteria;c__Actinobacteria;o__Actinomycetales;f__Actinomycetaceae;g__Varibaculum	0	0	0	0	0	0	0	0	0	0	0	0	0	0	0	0	0	0	0	0	0	0	0	0	0	0	0	0	0	0	0	0	0	0	0	0	0	0	0	0	0	0	0	0	0	0	0	0	0
k__Bacteria;p__Actinobacteria;c__Actinobacteria;o__Actinomycetales;f__Actinosynnemataceae;Other	0	0	0	0	0	0	0	0	0	0	0	0	0	0	0	0	0	0	0	0	0	0	0	0	0	0	0	0	0	0	0	0	0	8.60714823661e-05	0	0	0	0	0	0	0	0	0	0	0	0	0	0	0
k__Bacteria;p__Actinobacteria;c__Actinobacteria;o__Actinomycetales;f__Corynebacteriaceae;g__Corynebacterium	0	0	1.94208696665e-05	0	0	0	0	1.6410660365e-05	0.000226654578422	0	6.65181095553e-05	0	0	0	0	1.69857150137e-05	0	0	2.22642769676e-05	0	0	0	0	0	1.96741953254e-05	0	2.12666411467e-05	0	0	0	0	1.95936281521e-05	0	0	0	0	8.71778777417e-05	0	0	1.81244789212e-05	4.95761241386e-05	3.7337813871e-05	0	0	3.2575412079e-05	1.68007929974e-05	0.000721500721501	0.000418950528925	3.99289265108e-05
k__Bacteria;p__Actinobacteria;c__Actinobacteria;o__Actinomycetales;f__Microbacteriaceae;g__Yonghaparkia	0	0	0	0	0	0	0	0	0	0	0	0	0	0	0	0	0	0	0	0	0	0	0	0	0	0	0	0	0.000126489412836	0	0	0	0	4.30357411831e-05	0	0	0	0	0	0	0	0	0	0	0	0	0	0	0
k__Bacteria;p__Actinobacteria;c__Actinobacteria;o__Actinomycetales;f__Micrococcaceae;Other	0	0	1.94208696665e-05	0	0	0	0	0	0	0	0	0	0	0	0	0	0	0	0	0	0	0	0	0	0	0	0	0	0	0	0	0	0	0	0	0	0	0	0	0	0	0	0	0	0	0	0	0	0
k__Bacteria;p__Actinobacteria;c__Actinobacteria;o__Actinomycetales;f__Micrococcaceae;g__Arthrobacter	0	0	0	1.80261379e-05	0	0	0	0	0	0	0	0	0	0	0	0	0	0	0	0	0	0	0	0	0	0	0	0	0	0	0	0	0	0	0	0	0	0	0	0	0	0	0	0	0	0	0	0	0
k__Bacteria;p__Actinobacteria;c__Actinobacteria;o__Actinomycetales;f__Micrococcaceae;g__Kocuria	0	0	0	0	0	0	0	0	0	0	0	0	0	0	0	0	0	0	0	0	0	0	0	0	0	0	0	0	0	0	0	0	0	0	0	0	0	0	0	0	0	0	0	0	0	0	0	0	0
k__Bacteria;p__Actinobacteria;c__Actinobacteria;o__Actinomycetales;f__Micrococcaceae;g__Micrococcus	0	0	0	0	0	0	0	0	0	0	0	0	0	0	0	0	0	0	0	0	0	0	0	0	0	0	0	0	0	0	0	0	0	2.15178705915e-05	0	0	0	0	0	0	0	0	0	0	0	0	0	0	0
k__Bacteria;p__Actinobacteria;c__Actinobacteria;o__Actinomycetales;f__Micrococcaceae;g__Nesterenkonia	0	0	0.00145656522499	0	0	0	0	0	2.06049616748e-05	0	0	0	0	2.27350233034e-05	0	1.69857150137e-05	0	0	0	0	0	0	0	4.79126074041e-05	0	0	0	0	7.58936477017e-05	0	0	0	2.70102368798e-05	6.45536117746e-05	0	0	0	0	3.7853695467e-05	0	0.000148728372416	0	0	0	0	0	0	0	0.000379324801853
k__Bacteria;p__Actinobacteria;c__Actinobacteria;o__Actinomycetales;f__Micrococcaceae;g__Rothia	3.426946077e-05	0	0.000368996523664	1.80261379e-05	0	0	2.03911013234e-05	0	0	0	9.9777164333e-05	0	0	0	0	3.39714300273e-05	0	2.47157686604e-05	0	0	1.61316341345e-05	0	0	0	0	5.64365934872e-05	0	0	0	9.61607808255e-05	0.00063144172404	0	0	2.15178705915e-05	0	0	1.74355755483e-05	0	0	3.62489578425e-05	9.91522482772e-05	9.33445346775e-05	1.85030992691e-05	0	1.62877060395e-05	0	0.00023088023088	3.49125440771e-05	5.98933897662e-05
k__Bacteria;p__Actinobacteria;c__Actinobacteria;o__Actinomycetales;f__Nocardiaceae;g__Rhodococcus	0	0	3.88417393331e-05	0	0	0	0	0	0	0	0	0	0	0	0	0	0	0	0	0	0	0	0	0	0	0	0	0	0	0	0	0	0	0	0	0	0	0	0	0	0	0	0	0	0	0	0	0	0
k__Bacteria;p__Actinobacteria;c__Actinobacteria;o__Actinomycetales;f__Nocardioidaceae;g__Aeromicrobium	0	0	0	0	0	0	0	0	0	0	0	0	0	0	0	0	0	0	0	0	0	0	0	0	0	0	0	0	0	0	0	0	0	0	0	0	0	0	0	0	0	0	0	0	0	0	0	0	0
k__Bacteria;p__Actinobacteria;c__Actinobacteria;o__Actinomycetales;f__Promicromonosporaceae;g__Cellulosimicrobium	0	0	0	0	0	0	0	0	0	0	0	0	0	0	0	0	0	0	0	0	0	0	0	0	0	0	0	0	0	0	0	0	0	0	0	0	0	0	0	0	0	0	0	0	0	0	0	0	0
k__Bacteria;p__Actinobacteria;c__Actinobacteria;o__Actinomycetales;f__Propionibacteriaceae;g__	0	0	0	0	0	0	0	0	0	0	0	0	0	0	0	0	0	0	0	0	0	0	0	0	0	0	0	0	0	0	0	0	0	0	0	0	0	0	0	0	0	0	0	0	1.62877060395e-05	0	0	0	0
k__Bacteria;p__Actinobacteria;c__Actinobacteria;o__Actinomycetales;f__Streptomycetaceae;g__Kitasatospora	0	0	0	0	0	0	0	0	0	0	0	0	0	0	0	0	0	0	0	0	0	0	0	0	0	0	0	0	0	0	0	0	0	0	0	0	0	0	0	0	2.47880620693e-05	0	0	0	0	0	0	0	0
k__Bacteria;p__Actinobacteria;c__Actinobacteria;o__Bifidobacteriales;f__Bifidobacteriaceae;g__Bifidobacterium	0	0	0	0	0	0	0	0	0	0	0	0	0	0	0.00812479047112	0	0	0.00160652496293	0	0	0	0	0	0	0	0	0	0.000317925711359	0	0	0	0	0	0	0	0	0	0	0	0	0	0	0	0	0.000602645123461	0	0	0	0
k__Bacteria;p__Actinobacteria;c__Actinobacteria;o__Bifidobacteriales;f__Bifidobacteriaceae;g__Scardovia	0	0	0	0	0	0	0	0	0	0	0	0	0	0	0	0	0	0	0	0	0	0	0	0	0	0	0	0	0	0	0	0	0	0	0	0	0	1.71488347367e-05	0	0	0	1.86689069355e-05	0	0	0	0	0	0	0
k__Bacteria;p__Actinobacteria;c__Coriobacteriia;o__Coriobacteriales;f__Coriobacteriaceae;Other	0	0	0	0	0	0	0	0	0	0	0	0	0	0	0	0	0	0	0	0	0	0	0	0	0	0	0	0	0	0	0	0	0	0	0	0	0	1.71488347367e-05	0	0	0	0	0	0	0	0	0	0	0
k__Bacteria;p__Actinobacteria;c__Coriobacteriia;o__Coriobacteriales;f__Coriobacteriaceae;g__	0	0	0	0	0	0	0	0	0	0	0	0	0	0	0	0	0	0	0	0	0	0	0	0	0	2.82182967436e-05	0	0	7.58936477017e-05	0	0	0	0	0	0	4.585788641e-05	0.000174355755483	0.000291530190524	0	5.43734367637e-05	4.95761241386e-05	0	0	0	0.000130301648316	3.36015859949e-05	2.886002886e-05	1.74562720385e-05	1.99644632554e-05
k__Bacteria;p__Actinobacteria;c__Coriobacteriia;o__Coriobacteriales;f__Coriobacteriaceae;g__Adlercreutzia	0	0	0	0	0	0	0	0	0	0	0	0	0	0	0	0	0	0	0	0	0	0	0	0	0	0	0	0	0	0	0	0	0	0	0	0	0	0	0	0	0	0	0	0	0	0	0	0	0
k__Bacteria;p__Actinobacteria;c__Coriobacteriia;o__Coriobacteriales;f__Coriobacteriaceae;g__Atopobium	0	0	0	7.21045515998e-05	0	0	0	0	0	0	1.66295273888e-05	0	0	0	0	0	0	0	0	0	0	0	0	0	0	5.64365934872e-05	0	0.00397407139198	0	2.40401952064e-05	4.07381757445e-05	0	0	0	0	0.000160502602435	0.00845625414095	0	3.7853695467e-05	0.00821038895132	0	0	0	1.81435517817e-05	0.00063522053554	0.000168007929974	0	0.000925182418043	0.000219609095809
k__Bacteria;p__Actinobacteria;c__Coriobacteriia;o__Coriobacteriales;f__Coriobacteriaceae;g__Collinsella	0	0	0	0	0	0	0	0	0	0	0	0	0	0	0	0	0	0	0	0	0	0	0	0	0	0	0	0	0	0	0	0	0	0	0	0	0	0	0	0	0	0	0	0	0	0	0	0	0
k__Bacteria;p__Actinobacteria;c__Coriobacteriia;o__Coriobacteriales;f__Coriobacteriaceae;g__Coriobacterium	0	0	0	0	0	0	0	0	0	0	0	0	0	0	0	0	0	0	0	0	0	0	0	0	0	0	0	0	0	0	0	0	0	0	0	0	0	0	0	0	0	0	0	0	0	0	0	0	0
k__Bacteria;p__Actinobacteria;c__Coriobacteriia;o__Coriobacteriales;f__Coriobacteriaceae;g__Slackia	0	0	0	0	0	2.19843032075e-05	0	0	0	0	6.65181095553e-05	0	0	0	0	0	0	0	0	0	0	0	0	0	0	0	2.12666411467e-05	0	0	0	0	0	0	0	0	0.00032100520487	3.48711510967e-05	0.00236653919366	0.00032175641147	0.000126871352449	0	0	0	0	0.00123787	0.000739234891887	2.886002886e-05	0	0
k__Bacteria;p__Actinobacteria;c__MB-A2-108;o__0319-7L14;f__;g__	0	0	0	0	0	0	0	0	0	0	0	0	0	0	0	0	0	0	0	0	0	0	0	0	0	0	0	0	5.05957651345e-05	0	0	0	0	0	0	0	0	0	0	0	0	0	0	0	0	0	0	0	0
k__Bacteria;p__Bacteroidetes;Other;Other;Other;Other	0	0	0	0	0	0	0	0	0	0	0	0	0	0	0	0	0	0	0	0	0	0	0	0	0	0	0	0	0	0	0	0	0	0	0	2.2928943205e-05	0	0	0	0	0	0	0	0	1.62877060395e-05	3.36015859949e-05	0	3.49125440771e-05	1.99644632554e-05
k__Bacteria;p__Bacteroidetes;c__Bacteroidia;o__Bacteroidales;Other;Other	0	0	0	0	0	0	0	0	0	0	0	0	0	0	0	0	0	0	0	0	0	0	0	0	0	0	0	0	0	0	0	0	0	0	0	0	1.74355755483e-05	0.000137190677893	1.89268477335e-05	0	7.43641862079e-05	3.7337813871e-05	3.70061985383e-05	0	1.62877060395e-05	5.04023789923e-05	2.886002886e-05	3.49125440771e-05	3.99289265108e-05
k__Bacteria;p__Bacteroidetes;c__Bacteroidia;o__Bacteroidales;f__;g__	0	0	0	0	0	0	0	0	0	0	0	0	0	0	0	0	0	2.47157686604e-05	0	0	0	0	0	0	0	0	0	0	0	0	0	0	0	0	0	9.171577282e-05	3.48711510967e-05	5.144650421e-05	1.89268477335e-05	9.06223946062e-05	0.00136334341381	9.33445346775e-05	0.000148024794153	0.000199579069599	0.000162877060395	0.000100804757985	0.00020202020202	0.000610969521349	0.000339395875342
k__Bacteria;p__Bacteroidetes;c__Bacteroidia;o__Bacteroidales;f__Bacteroidaceae;g__Bacteroides	0	0	0	0	0	0	0	0	0	0	0	0	0	0	0	0	0	0	0	0	0	0	0	0	0	0	0	0	0	0	0	0	0	0	0	4.585788641e-05	0	0.00171488347367	0	0.000851850509298	0	0	0	0	0	0	8.65800865801e-05	3.49125440771e-05	3.99289265108e-05
k__Bacteria;p__Bacteroidetes;c__Bacteroidia;o__Bacteroidales;f__Porphyromonadaceae;Other	0	0	0	0	0	0	0	0	0	0	0	0	0	0	0	0	0	0	0	0	0	0	0	0	0	0	0	0	0	0	0	0	0	0	0	0	0	8.57441736834e-05	0	1.81244789212e-05	0	0	0	0	1.62877060395e-05	0	0	1.74562720385e-05	0
k__Bacteria;p__Bacteroidetes;c__Bacteroidia;o__Bacteroidales;f__Porphyromonadaceae;g__Paludibacter	1.7134730385e-05	1.99409747148e-05	0	0	0	0	0	0	4.12099233495e-05	0	0	0	0	0	0	0	2.33765019402e-05	0	0	0	0	0	0	0	0	0	0	0	0	0	0	0	0	0	0	6.8786829615e-05	0	3.42976694734e-05	1.89268477335e-05	3.62489578425e-05	0.000123940310347	1.86689069355e-05	3.70061985383e-05	0	0	5.04023789923e-05	8.65800865801e-05	0.000331669168732	9.9822316277e-05
k__Bacteria;p__Bacteroidetes;c__Bacteroidia;o__Bacteroidales;f__Porphyromonadaceae;g__Parabacteroides	0	0	0	0	0	0	0	0	0	0	0	0	0	0	0	0	0	0	0	0	0	0	0	0	0	0	0	0	0	0	0	0	0	0	0	0	0	0	0	0	0	0	0	0	0	0	0	0	0
k__Bacteria;p__Bacteroidetes;c__Bacteroidia;o__Bacteroidales;f__Porphyromonadaceae;g__Porphyromonas	0	7.97638988594e-05	0	0	0	0	0	0	2.06049616748e-05	0	1.66295273888e-05	0	0	0	1.97203652212e-05	5.0957145041e-05	0.000116882509701	0	0	0	3.22632682691e-05	0	0	0	0	0	0	0	0	0	0	0	0	2.15178705915e-05	0	0.000298076261665	0.00709627924818	0.0225507176787	0.000302829563736	0.0142820893899	0.00151207178623	0.000112013441613	0.00020353409196	0.00010886131069	0.00242686819988	3.36015859949e-05	0.00020202020202	0.00315958523898	0.000598933897662
k__Bacteria;p__Bacteroidetes;c__Bacteroidia;o__Bacteroidales;f__Porphyromonadaceae;g__Tannerella	0	0	0	0	0	0	0	0	0	0	0	0	0	0	0	0	0	0	0	1.63792115048e-05	0	0	0	0	0	0	0	0	0	0	0	0	0	0	0	0.00018343154564	0.00010461345329	0.000600209215784	5.67805432005e-05	0.000525609888716	0.000867582172426	7.4675627742e-05	0.000166527893422	0.000145148414254	0.000211740178513	3.36015859949e-05	0.0002886002886	0.000523688161156	0.000159715706043
k__Bacteria;p__Bacteroidetes;c__Bacteroidia;o__Bacteroidales;f__Prevotellaceae;Other	0	0	0	0	0	0	0	0	0	0	0	0	0	0	0	0	0	0	0	0	0	0	0	0	0	0	0	0	0	0	0	0	0	0	0	0	0	0	0	0	0	0	0	0	0	0	0	0	0
k__Bacteria;p__Bacteroidetes;c__Bacteroidia;o__Bacteroidales;f__Prevotellaceae;g__Prevotella	0	0.000119645848289	0	0.000216313654799	0	8.793721283e-05	2.03911013234e-05	6.56426414599e-05	0.000103024808374	1.60264115262e-05	3.32590547777e-05	0	1.88040616773e-05	2.27350233034e-05	3.94407304423e-05	5.0957145041e-05	9.3506007761e-05	9.88630746416e-05	2.22642769676e-05	1.63792115048e-05	6.45265365382e-05	1.60924349463e-05	7.37880315813e-05	1.59708691347e-05	7.86967813016e-05	0.000282182967436	0.000148866488027	0.000441563487998	0.000126489412836	0.000144241171238	2.03690878722e-05	5.87808844564e-05	0	2.15178705915e-05	0	0.0301286313714	0.00448094291593	0.171231	0.00357717422163	0.0213868851271	0.919166	0.000112013441613	0.00151725414007	0.000181435517817	0.0360772688775	0.153744	0.000606060606061	0.0373389658904	0.00549022739524
k__Bacteria;p__Bacteroidetes;c__Bacteroidia;o__Bacteroidales;f__Rikenellaceae;g__	0	0	0	0	0	0	0	0	0	0	0	0	0	0	0	0	0	0	0	0	0	0	0	0	0	0	0	0	0	0	0	0	0	0	0	0	0	0	0	0	0	0	0	0	0	0	0	0	0
k__Bacteria;p__Bacteroidetes;c__Bacteroidia;o__Bacteroidales;f__Rikenellaceae;g__Blvii28	0	0	0	0	0	0	0	0	0	0	0	0	0	0	0	0	0	0	0	0	0	0	0	0	0	0	0	0	0	0	0	0	0	0	0	0	0	0	0	0	0	0	0	0	0	1.68007929974e-05	5.77200577201e-05	1.74562720385e-05	5.98933897662e-05
k__Bacteria;p__Bacteroidetes;c__Bacteroidia;o__Bacteroidales;f__S24-7;g__	0	0	0	0	0	0	0	0	0	0	0	0	0	0	0	0	0	0	0	0	0	0	0	0	0	0	0	0	7.58936477017e-05	0	0	0	0	0	0	0	0	0	0	0	0	0	0	0	0	0	0	0	0
k__Bacteria;p__Bacteroidetes;c__Bacteroidia;o__Bacteroidales;f__[Barnesiellaceae];g__	0	0	0	0	0	0	0	0	0	0	0	0	0	0	0	0	0	0	0	0	0	0	0	0	0	0	0	0	0	0	0	0	0	0	0	0	0	0	0	0	0	0	0	0	0	0	0	0	0
k__Bacteria;p__Bacteroidetes;c__Bacteroidia;o__Bacteroidales;f__[Odoribacteraceae];g__Odoribacter	0	0	0	0	0	0	0	0	0	0	0	0	0	0	0	0	0	0	0	0	0	0	0	0	0	0	0	0	0	0	0	0	0	0	0	0	0	0	0	0	0	0	0	0	0	1.68007929974e-05	0.00020202020202	0.00012219390427	7.98578530216e-05
k__Bacteria;p__Bacteroidetes;c__Bacteroidia;o__Bacteroidales;f__[Paraprevotellaceae];g__	0	0	0	0	0	0	0	0	0	0	0	0	0	0	0	0	0	0	0	0	0	0	0	0	0	0	0	0	0	0	0	0	0	0	0	0	0	0	0	0	0	0	0	0	0	0	0	0	0
k__Bacteria;p__Bacteroidetes;c__Bacteroidia;o__Bacteroidales;f__[Paraprevotellaceae];g__[Prevotella]	0	1.99409747148e-05	0	1.80261379e-05	0	2.19843032075e-05	0	0	0	0	1.66295273888e-05	0	0	0	0	0	0	0	0	0	3.22632682691e-05	0	0	0	0	0	0	0	0	0	0	0	2.70102368798e-05	0	0	0.00032100520487	3.48711510967e-05	0.00454444120522	0.000435317497871	0.0047848624352	0.000297456744832	7.4675627742e-05	0.000296049588306	0	0.0190077529481	1.68007929974e-05	2.886002886e-05	0.0108578	0.00307452734133
k__Bacteria;p__Bacteroidetes;c__Cytophagia;o__Cytophagales;f__Cytophagaceae;g__	0	1.99409747148e-05	0	0	0	0	0	0	0	0	0	0	0	0	0	0	0	0	0	0	0	0	0	0	0	0	0	0	0	0	0	0	0	0	0	0	0	0	0	0	0	0	0	0	0	0	0	0	0
k__Bacteria;p__Bacteroidetes;c__Flavobacteriia;o__Flavobacteriales;Other;Other	0	0	0	0	0	0	0	0	0	0	0	0	0	0	0	0	0	0	0	0	0	0	0	0	0	0	0	0	0	0	0	0	0	0	0	0	0	0	0	0	0	0	0	0	0	0	0	0	0
k__Bacteria;p__Bacteroidetes;c__Flavobacteriia;o__Flavobacteriales;f__Cryomorphaceae;g__Crocinitomix	0	0	0	0	0	0	0	0	0	0	0	0	0	0	0	0	0	0	0	0	0	0	0	0	0	0	0	0	0	0	0	0	0	0	0	0	0	0	0	1.81244789212e-05	0	0	0	0	0	0	0	0	0
k__Bacteria;p__Bacteroidetes;c__Flavobacteriia;o__Flavobacteriales;f__Cryomorphaceae;g__Fluviicola	0	0	0	0	0	0	0	0	0	0	0	2.02478334818e-05	0	0	0	0	0	0	0	0	0	0	0	0	0	0	0	0	0	0	0	0	0	0	0	0	0	0	0	0	0	0	0	0	0	0	0	0	0
k__Bacteria;p__Bacteroidetes;c__Flavobacteriia;o__Flavobacteriales;f__Flavobacteriaceae;Other	0	0	0	0	0	0	0	0	0	0	0	0	0	0	0	0	0	0	0	0	0	0	0	0	0	0	0	0	0	0	0	0	0	0	0	0.00041272097769	0	0	0	0	0	0	0	0	0	0	0	0	0
k__Bacteria;p__Bacteroidetes;c__Flavobacteriia;o__Flavobacteriales;f__Flavobacteriaceae;g__Capnocytophaga	0.000582580833091	3.98819494297e-05	0	1.80261379e-05	0	0	0	1.6410660365e-05	0.000103024808374	3.20528230524e-05	4.98885821665e-05	2.02478334818e-05	0	0	3.94407304423e-05	0.000135885720109	0	2.47157686604e-05	0	0	1.61316341345e-05	1.60924349463e-05	0	0	0	0.000169309780462	2.12666411467e-05	3.53250790399e-05	0	0	0	0	8.10307106393e-05	0.000215178705915	0	0.495334	0.0021271402169	0.00471592955259	5.67805432005e-05	0.00228368434408	0.0122205146002	0.000186689069355	0	0	0.000374617238908	0.000957645200853	0.00176046176046	0.00431169919352	9.9822316277e-05
k__Bacteria;p__Bacteroidetes;c__Flavobacteriia;o__Flavobacteriales;f__Flavobacteriaceae;g__Flavobacterium	0	0	0	0	0	0	0	0	0	0	0	0	0	0	0	0	0	0	0	0	0	0	0	0	0	0	0	0	0	0	0	0	0	0	0	0	0	0	0	0	0	0	0	0	0	0	0	0	0
k__Bacteria;p__Bacteroidetes;c__Flavobacteriia;o__Flavobacteriales;f__[Weeksellaceae];g__	0	0	0	0	0	0	0	0	0	0	0	0	0	0	0	0	0	0	0	0	0	1.60924349463e-05	0	0	0	0	0	0	0	0	0	0	0	0	0	0	1.74355755483e-05	0	0	3.62489578425e-05	0	0	0	0	0	0	2.886002886e-05	3.49125440771e-05	0
k__Bacteria;p__Bacteroidetes;c__Flavobacteriia;o__Flavobacteriales;f__[Weeksellaceae];g__Chryseobacterium	0	0	0.000194208696665	0	0	0	0	0	0	0	0	0	0	0	0	0	0	0	0	0	0	0	0	0	0	0	0	0	0	0	0	0	0	2.15178705915e-05	0	0	0	0	0	0	0	0	0	0	0	0	0	0	0
k__Bacteria;p__Bacteroidetes;c__[Saprospirae];o__[Saprospirales];f__Chitinophagaceae;g__	0	0	0	0	0	0	0	0	0	0	0	0	0	0	0	0	0	0	0	0	0	0	0	0	0	0	0	0	0	0	0	0	0	2.15178705915e-05	0	0	0	0	0	0	0	0	0	0	0	0	0	0	0
k__Bacteria;p__Bacteroidetes;c__[Saprospirae];o__[Saprospirales];f__Saprospiraceae;g__	0	0	0	0	0	0	0	0	0	0	0	0	0	0	0	0	0	0	0	0	0	0	0	0	0	0	0	0	2.52978825672e-05	0	0	0	0	0	0	0	0	0	0	0	0	0	0	0	0	0	0	0	0
k__Bacteria;p__Chloroflexi;c__Anaerolineae;o__Anaerolineales;f__Anaerolinaceae;g__SHD-231	0	0	0	0	0	0	0	0	0	0	0	0	0	0	0	0	0	0	0	0	0	0	0	0	0	0	0	0	0	0	0	0	0	0	0	0	0	0	0	0	4.95761241386e-05	0	1.85030992691e-05	1.81435517817e-05	0	0	0	0	1.99644632554e-05
k__Bacteria;p__Chloroflexi;c__Anaerolineae;o__GCA004;f__;g__	0	0	0	0	0	0	0	0	0	0	0	0	0	0	0	0	0	0	0	0	0	0	0	0	0	0	0	0	0	0	0	0	0	0	0	0	0	0	0	0	0	0	0	0	0	0	0	0	0
k__Bacteria;p__Cyanobacteria;c__Chloroplast;o__Streptophyta;f__;g__	0	1.99409747148e-05	0.000116525217999	0	0	0	0	0	0	0	1.66295273888e-05	0	0	0	0	0	0	0	0	0	0	0	0	0	0	0	0	0	0	0	0	0	0	2.15178705915e-05	0	0	3.48711510967e-05	0	0	0	0	0	0	0	0	0	0	0	0
k__Bacteria;p__Elusimicrobia;c__Endomicrobia;o__;f__;g__	0	0	0	0	0	0	0	0	0	0	0	0	0	0	0	0	0	0	0	0	0	0	0	0	0	0	0	0	0	0	0	0	0	0	0	0	0	0	0	0	0	0	0	0	0	1.68007929974e-05	8.65800865801e-05	5.23688161156e-05	1.99644632554e-05
k__Bacteria;p__Firmicutes;Other;Other;Other;Other	0	0	1.94208696665e-05	0	0.000142775556825	6.59529096225e-05	0.000142737709264	0	0	0	0.000116406691722	0	0	0	0	0	0	0.000247157686604	0	0	0.000225842877884	0	0	0	0	0	2.12666411467e-05	0.000158962855679	0	0	0	1.95936281521e-05	0	0	0	2.2928943205e-05	0.00010461345329	0.000188637182103	0.000132487934135	1.81244789212e-05	0	0	0	3.62871035634e-05	4.88631181184e-05	6.72031719897e-05	0	3.49125440771e-05	9.9822316277e-05
k__Bacteria;p__Firmicutes;c__Bacilli;Other;Other;Other	1.7134730385e-05	0	3.88417393331e-05	0	6.11895243534e-05	2.19843032075e-05	0	0	0	1.60264115262e-05	0	0	0	0	0	0	4.67530038805e-05	0.000123578843302	0	0	1.61316341345e-05	0	0	0	0	0	0	1.76625395199e-05	0	0	0	0	0	0	0	2.2928943205e-05	1.74355755483e-05	8.57441736834e-05	1.89268477335e-05	1.81244789212e-05	0	0	0	1.81435517817e-05	1.62877060395e-05	1.68007929974e-05	0	3.49125440771e-05	1.99644632554e-05
k__Bacteria;p__Firmicutes;c__Bacilli;o__Bacillales;Other;Other	1.7134730385e-05	0	0	0	8.15860324712e-05	2.19843032075e-05	2.03911013234e-05	0	0	0	1.66295273888e-05	0	0	0	0	0	2.33765019402e-05	2.47157686604e-05	0	1.63792115048e-05	3.22632682691e-05	0	0	0	0	0	2.12666411467e-05	0	0	0	0	0	0	0	0	0	1.74355755483e-05	3.42976694734e-05	3.7853695467e-05	1.81244789212e-05	0	0	0	0	0	1.68007929974e-05	0	0	1.99644632554e-05
k__Bacteria;p__Firmicutes;c__Bacilli;o__Bacillales;f__Bacillaceae;Other	0	0	0	1.80261379e-05	0	0	0	0	0	0	0	0	0	0	0	0	0	0	0	0	0	0	0	0	0	0	0	0	0	0	0	0	0	0	0	0	1.74355755483e-05	0	0	1.81244789212e-05	0	0	0	0	0	0	0	0	0
k__Bacteria;p__Firmicutes;c__Bacilli;o__Bacillales;f__Bacillaceae;g__Bacillus	0	0	0	0	0	0	0	0	0	0	0	0	0	0	0	0	0	0	0	0	0	0	0	0	0	0	0	0	0	0	0	1.95936281521e-05	0	0	0	0	0	0	0	0	0	0	0	0	0	0	0	0	1.99644632554e-05
k__Bacteria;p__Firmicutes;c__Bacilli;o__Bacillales;f__Planococcaceae;g__Lysinibacillus	0	0	0	0	0	0	0	0	0	0	0	0	0	0	0	0	0	0	0	0	0	0	0	0	0	0	0	0	0	0	0	0	0	0	0	0	0	0	0	0	0	0	0	0	0	0	0	0	0
k__Bacteria;p__Firmicutes;c__Bacilli;o__Bacillales;f__Planococcaceae;g__Sporosarcina	0	0	0	0	0	0	0	0	0	0	0	0	0	0	0	0	0	0	0	0	0	0	0	0	0	0	0	0	0	0	0	0	0	0	0	0	0	0	0	0	0	0	0	0	0	0	0	0	0
k__Bacteria;p__Firmicutes;c__Bacilli;o__Bacillales;f__Staphylococcaceae;g__Staphylococcus	0	0	0.000252471305665	0	0	0	0	0	0	0	0	0	0	0	0	0	0	0	0	0	0	0	0	0	0	0	0	0	0	0	0	0	0	0	0	0	0	0	0	0	0	0	0	0	0	0	0	0	0
k__Bacteria;p__Firmicutes;c__Bacilli;o__Bacillales;f__[Exiguobacteraceae];g__Exiguobacterium	0	0	0	0	0	0	0	0	0	0	0	0	0	0	0	0	0	0	0	0	0	0	0	0	0	0	0	0	0	0	0	0	0	0	0	0	0	0	0	0	0	0	0	0	0	0	0	0	0
k__Bacteria;p__Firmicutes;c__Bacilli;o__Gemellales;Other;Other	0	0	0	0	0	0	0	0	0	0	0	0	0	0	0	0	0	0	0	0	0	0	0	0	0	0	0	0	0	0	0	0	0	0	0	0	0	0	0	0	0	0	0	0	0	0	0	0	0
k__Bacteria;p__Firmicutes;c__Bacilli;o__Gemellales;f__Gemellaceae;Other	0	0	3.88417393331e-05	0	0	0	0	0	0	0	0	0	0	0	0	0	0	0	0	0	0	0	0	0	0	0	0	0	0	0	0	0	0	0	0	0	0	0	0	0	0	0	0	0	0	0	0	0	0
k__Bacteria;p__Firmicutes;c__Bacilli;o__Gemellales;f__Gemellaceae;g__	0.0442761433149	5.98229241445e-05	0.0312093375541	3.60522757999e-05	0	0	0	0	0	0	0	0	0	0	0	0	0	0	0.000133585661806	0	1.61316341345e-05	0	0	0	0.000531203273786	0	2.12666411467e-05	0.00529876185598	0	0	6.11072636167e-05	1.95936281521e-05	2.70102368798e-05	0	0	2.2928943205e-05	3.48711510967e-05	0.000600209215784	0	0.00028999166274	0	7.4675627742e-05	0	0	0.00094468695029	1.68007929974e-05	0.00155844155844	0	0
k__Bacteria;p__Firmicutes;c__Bacilli;o__Gemellales;f__Gemellaceae;g__Gemella	0	0	0	0	0	0	0	0	0	0	0	0	0	0	0	0	0	0	0	0	0	0	0	0	0	0	0	0	0	0	0	0	0	0	0	0	0	1.71488347367e-05	0	0	0	0	0	0	0	0	0	0	0
k__Bacteria;p__Firmicutes;c__Bacilli;o__Lactobacillales;Other;Other	0	0	0.0046415878503	0.0017485353763	4.07930162356e-05	2.19843032075e-05	0.000530168634408	0.00344623867664	0	0	0.000814846842053	0	0	0	0.00445680253998	0	0	0.000247157686604	0.0110653456529	0	0.000806581706727	0	0	0.00247548471588	0.00194774533722	0.00493820193013	0.0268385011271	0.000706501580797	0	0	0.00332016132318	0	0	0	0	0	0.000488196115354	8.57441736834e-05	0.000473171193338	0.00074310363577	0	0.00186689069355	0.0027569617911	1.81435517817e-05	0.000684083653658	0	0.00106782106782	0.00071570715358	0.000279502485576
k__Bacteria;p__Firmicutes;c__Bacilli;o__Lactobacillales;f__Aerococcaceae;Other	0	0	0	0	0	0	0	0	0	0	0	0	0	0	1.97203652212e-05	0	0	0	8.90571078704e-05	0	0	0	0	1.59708691347e-05	0	2.82182967436e-05	0.00012759984688	0	0	0	0	0	0	0	0	0	0	0	1.89268477335e-05	0	0	1.86689069355e-05	1.85030992691e-05	0	0	0	0	0	0
k__Bacteria;p__Firmicutes;c__Bacilli;o__Lactobacillales;f__Aerococcaceae;g__Abiotrophia	0	0	0	0	0	0	0	0.000213338584745	0	0	0	0	0	0	0	0	0	0	0	0	0	1.60924349463e-05	0	0	0	0	0	0	0	0	0	0	0	0	0	0	0.000453324964257	0.000634506885257	0.00196839216429	0.000271867183818	0	0	0	7.25742071268e-05	0	0	0	0	0
k__Bacteria;p__Firmicutes;c__Bacilli;o__Lactobacillales;f__Aerococcaceae;g__Granulicatella	0	0	3.88417393331e-05	0	0	0	2.03911013234e-05	0.000147695943285	0	0	0	0	0	0	0.000118322191327	0	0	2.47157686604e-05	0.000690192585996	0	4.83949024036e-05	0	0	9.58252148082e-05	5.90225859762e-05	0.000253964670692	0.00108459869848	0	0	0	6.11072636167e-05	0	0	0	0	2.2928943205e-05	1.74355755483e-05	0	1.89268477335e-05	1.81244789212e-05	0	0.000112013441613	0.000129521694884	0	1.62877060395e-05	0	2.886002886e-05	3.49125440771e-05	0
k__Bacteria;p__Firmicutes;c__Bacilli;o__Lactobacillales;f__Carnobacteriaceae;Other	0	0	0.00157309044299	0.000270392068499	0	0	0.000142737709264	0.00146054877248	0	0	0.000266072438221	0	0	0	0.00386519158335	0	0	7.41473059812e-05	0.0087943894022	0	0.000387159219229	0	0	0.000862426933274	0.000708271031715	0.00231390033298	0.0151843817787	0.000247275553279	0	0	0.00177211064489	0	0	0	0	0	0.000156920179935	3.42976694734e-05	0.000151414781868	0.000235618225976	0	0.00166153271726	0.00135072624665	0	0.000537494299303	0	0.00023088023088	0.000384037984848	9.9822316277e-05
k__Bacteria;p__Firmicutes;c__Bacilli;o__Lactobacillales;f__Carnobacteriaceae;g__	0	0	0	0	0	0	0	0	0	0	0	0	0	0	3.94407304423e-05	0	0	0	2.22642769676e-05	0	0	0	0	1.59708691347e-05	0	0	8.50665645868e-05	0	0	0	4.07381757445e-05	0	0	0	0	0	1.74355755483e-05	0	0	0	0	0	0	0	0	0	0	0	0
k__Bacteria;p__Firmicutes;c__Bacilli;o__Lactobacillales;f__Carnobacteriaceae;g__Granulicatella	1.7134730385e-05	0	0.0706337029772	0.0468138801262	0	0	0.0102567239657	0.12564	0.000576938926894	0	0.0231150430705	0	0	0	0.131456	0	0	0.00190311418685	0.306201	3.27584230095e-05	0.0219712856912	3.21848698927e-05	0	0.0800619669722	0.0443456362635	0.105706	0.502531	0.0175918893619	5.05957651345e-05	7.21205856192e-05	0.102966	0	0	0	0	0	0.0189524706211	0.000583060381047	0.0104286931012	0.0208793997173	4.95761241386e-05	0.061066	0.105671	1.81435517817e-05	0.0209459899668	0.000134406343979	0.0247619047619	0.0195161121391	0.00568987202779
k__Bacteria;p__Firmicutes;c__Bacilli;o__Lactobacillales;f__Carnobacteriaceae;g__Isobaculum	0	0	1.94208696665e-05	1.80261379e-05	0	0	0	0	0	0	0	0	0	0	1.97203652212e-05	0	0	0	6.67928309028e-05	0	1.61316341345e-05	0	0	0	3.93483906508e-05	0.000169309780462	0.000170133129174	5.29876185598e-05	0	0	6.11072636167e-05	0	0	0	0	0	1.74355755483e-05	0	0	0	0	1.86689069355e-05	3.70061985383e-05	0	0	0	0	0	0
k__Bacteria;p__Firmicutes;c__Bacilli;o__Lactobacillales;f__Enterococcaceae;Other	0	0	0	0	0	0	0	0	0	0	0	0	0	0	1.97203652212e-05	0	0	0	0	0	0	0	0	0	0	0.000169309780462	6.37999234401e-05	0	0	0	2.03690878722e-05	0	0	0	0	0	0	0	0	0	0	0	0	0	0	0	0	0	0
k__Bacteria;p__Firmicutes;c__Bacilli;o__Lactobacillales;f__Enterococcaceae;g__Enterococcus	0	0	1.94208696665e-05	0	0	0	0	0	0	0	0	0	0	0	0	0	0	0	0	0	0	0	0	0	0	0	0	0	0	0	0	0	0	0	0	0	0	0	0	0	0	0	0	0	0	0	0	0	0
k__Bacteria;p__Firmicutes;c__Bacilli;o__Lactobacillales;f__Enterococcaceae;g__Vagococcus	0	0	0	0	0	0	0	0	0	0	0	0	0	0	0	0	0	0	0	0	0	0	0	0	0	0	0	1.76625395199e-05	0	0	0	0	0	0	0	0	0	0	0	0	0	0	0	0	0	0	0	0	0
k__Bacteria;p__Firmicutes;c__Bacilli;o__Lactobacillales;f__Lactobacillaceae;g__Lactobacillus	0	0	1.94208696665e-05	0	0	0	0	0	0	0	0	0	0	0	0	0	0	0	4.45285539352e-05	0	0	0	0	0	0.363678	0	0	0.111645	0	0	0	0	0	0	0	0	0	0	0	0	2.47880620693e-05	0	0	0	0	0	0	0	1.99644632554e-05
k__Bacteria;p__Firmicutes;c__Bacilli;o__Lactobacillales;f__Leuconostocaceae;g__Leuconostoc	0	0	0	0.0103109508788	0	0	0.0298729634388	0	0	0	0	0	0	0	0	0	0	0	0	0	0	0	0	0	0	0	0	0	0	0	0	0	0	0	0	0	0	0	0	0	0	0	0	0	0	0	0	0	0
k__Bacteria;p__Firmicutes;c__Bacilli;o__Lactobacillales;f__Streptococcaceae;Other	0	0	1.94208696665e-05	0	0	0	0	1.6410660365e-05	0	0	0	0	0	0	9.86018261058e-05	0	0	0	6.67928309028e-05	0	0	0	0	0	5.90225859762e-05	8.46548902308e-05	0	0	0	0	4.07381757445e-05	0	0	0	0	0	0	0	0	0	0	0	0	0	0	0	0	0	0
k__Bacteria;p__Firmicutes;c__Bacilli;o__Lactobacillales;f__Streptococcaceae;g__	0	0	0.00328212697365	0.0011356466877	0	0	0.000163128810587	0.000853354338979	0	1.60264115262e-05	0.000232813383444	0	0	0	0.00155790885247	0	0	0	0.0040520984081	0	0.000306501048556	0	0	0.00111796083943	0.00204611631384	0.00437383599526	0.00559312662158	0.000194287934719	0	0	0.00236281419318	0	0	0	0	0	3.48711510967e-05	0	7.5707390934e-05	0.00028999166274	0	0.000709418463549	0.00116569525396	0	0.00030946641475	0	0.00046176046176	0.000401494256886	5.98933897662e-05
k__Bacteria;p__Firmicutes;c__Bacilli;o__Lactobacillales;f__Streptococcaceae;g__Streptococcus	0.931255	0.974575	0.850731	0.873763	0.462736	0.396817	0.324096	0.790534	0.969979	0.999183	0.58082	0.307889	0.99953	0.998022	0.779822	0.982539	0.899785	0.302051	0.595592	0.90577	0.30313	0.000225294089249	0.00600142656861	0.892596	0.575588	0.790705	0.407852	0.319356	0.000202383060538	0.998894	0.777346	0.999236	0.99846	0.997224	0.996129	0.241304	0.296108	0.327234	0.413854	0.328144	0.000570125427594	0.623112	0.357165	0.313212	0.33766	0.275802	0.871082	0.511486	0.721116
k__Bacteria;p__Firmicutes;c__Clostridia;Other;Other;Other	0	0	0	0	0	2.19843032075e-05	2.03911013234e-05	0	0	0	0	0	0	0	0	0	0	2.47157686604e-05	0	0	0	0	0	0	0	0	0	1.76625395199e-05	0	0	0	0	0	0	0	0	1.74355755483e-05	1.71488347367e-05	0	0	4.95761241386e-05	0	1.85030992691e-05	0	0	1.68007929974e-05	0	1.74562720385e-05	0
k__Bacteria;p__Firmicutes;c__Clostridia;o__Clostridiales;Other;Other	0	0	0	0	0	0	2.03911013234e-05	0	0	0	0	0	0	0	0	0	2.33765019402e-05	2.47157686604e-05	0	0	1.61316341345e-05	0	0	0	0	0	0	0	0	0	0	0	0	0	0	2.2928943205e-05	1.74355755483e-05	0.000188637182103	1.89268477335e-05	0.000126871352449	0.000123940310347	0	0	0	0	0	0	0	0
k__Bacteria;p__Firmicutes;c__Clostridia;o__Clostridiales;f__;g__	0	0	0	0	0	0	0	0	0	0	0	0	0	0	0	0	0	0	0	0	0	0	0	0	0	0	0	1.76625395199e-05	0	0	0	0	0	0	0	4.585788641e-05	1.74355755483e-05	0.00015433951263	1.89268477335e-05	0.0014499583137	0.000247880620693	1.86689069355e-05	3.70061985383e-05	1.81435517817e-05	1.62877060395e-05	0.000319215066951	5.77200577201e-05	0.000104737632231	9.9822316277e-05
k__Bacteria;p__Firmicutes;c__Clostridia;o__Clostridiales;f__Clostridiaceae;g__	0	0	0	0	0	0	0	0	0	0	0	0	0	0	0	0	0	0	0	0	0	0	0	0	0	0	0	0	0	0	0	0	0	0	0	0	0	0	0	0	0	0	0	0	0	0	0	0	0
k__Bacteria;p__Firmicutes;c__Clostridia;o__Clostridiales;f__Clostridiaceae;g__Clostridium	0	0	0	0	0	0	0	0	0	0	0	0	0	0	0	0	0	0	0	0	0	0	0	0	0	0	0	0	0	0	0	0	0	0	1.92596587188e-05	0	0	0	0	0	0	0	0	0	0	0	0	0	0
k__Bacteria;p__Firmicutes;c__Clostridia;o__Clostridiales;f__Clostridiaceae;g__Oxobacter	0	0	0	0	0	0	0	0	0	0	0	0	0	0	0	0	0	0	0	0	0	0	0	0	0	0	0	0	0	0	0	0	0	0	0	0	0	0	0	0	0	0	0	0	0	0	0	0	0
k__Bacteria;p__Firmicutes;c__Clostridia;o__Clostridiales;f__Clostridiaceae;g__SMB53	0	0	0	0	0	0	0	0	0	0	0	0	0	0	0	0	0	0	0	0	0	0	0	0	0	0	0	0	0	0	0	0	0	0	0	0	0	0	0	0	0	0	0	0	0	0	0	0	0
k__Bacteria;p__Firmicutes;c__Clostridia;o__Clostridiales;f__Eubacteriaceae;g__Pseudoramibacter_Eubacterium	0	0	0	0	0	0	0	0	0	0	0	0	0	0	0	0	2.33765019402e-05	0	0	0	0	0	0	0	0	0	0	0	0	0	0	0	0	0	0	0	0	3.42976694734e-05	0	0.000126871352449	0.000148728372416	3.7337813871e-05	0	0	0.000162877060395	0	0	1.74562720385e-05	1.99644632554e-05
k__Bacteria;p__Firmicutes;c__Clostridia;o__Clostridiales;f__Lachnospiraceae;Other	0	0	0	0	0	0	0	0	0	0	0	0	0	0	0	0	0	0	0	0	0	0	0	0	0	0	0	0	0	0	0	0	0	0	0	2.2928943205e-05	0	5.144650421e-05	1.89268477335e-05	0.000308116141661	7.43641862079e-05	0	0	1.81435517817e-05	4.88631181184e-05	0	0	3.49125440771e-05	1.99644632554e-05
k__Bacteria;p__Firmicutes;c__Clostridia;o__Clostridiales;f__Lachnospiraceae;g__	0	0	0	0	0	0	0	0	2.06049616748e-05	0	0	0	0	0	0	0	0	2.47157686604e-05	0	0	0	0	0	0	0	0	0	0	0	0	0	0	0	0	0	0	6.97423021934e-05	0.000188637182103	0.00113561086401	0.00958784934933	9.91522482772e-05	3.7337813871e-05	1.85030992691e-05	1.81435517817e-05	0.00607531435273	1.68007929974e-05	0	0.00024438780854	0.00451196869572
k__Bacteria;p__Firmicutes;c__Clostridia;o__Clostridiales;f__Lachnospiraceae;g__Blautia	0	0	0	0	0	0	0	0	0	0	0	0	0	0	0	0	0	0	0	0	0	0	0	0	0	0	0	0	0	0	0	0	0	0	0	0	0	0	0	0	0	0	0	0	0	0	0	0	0
k__Bacteria;p__Firmicutes;c__Clostridia;o__Clostridiales;f__Lachnospiraceae;g__Butyrivibrio	0	0	0	0	0	0	0	0	0	0	0	0	0	0	0	0	0	0	0	0	0	0	0	0	0	0	0	0	0	0	0	0	0	0	0	0	0	0	3.7853695467e-05	1.81244789212e-05	2.47880620693e-05	0	0	1.81435517817e-05	0	0	0	0	0
k__Bacteria;p__Firmicutes;c__Clostridia;o__Clostridiales;f__Lachnospiraceae;g__Catonella	0	0	0	0	0	0	0	0	0	0	0	0	0	0	0	0	2.33765019402e-05	0	0	0	0	1.60924349463e-05	0	0	0	0	0	0	0	0	0	0	0	0	0	2.2928943205e-05	3.48711510967e-05	0.000497316207364	1.89268477335e-05	0.0067423061587	0.000322244806901	0	0.000111018595615	1.81435517817e-05	0.0145123460812	0.000134406343979	0	0.00644136438222	0.000199644632554
k__Bacteria;p__Firmicutes;c__Clostridia;o__Clostridiales;f__Lachnospiraceae;g__Clostridium	0	0	0	0	0	0	0	0	0	0	0	0	0	0	0	0	0	0	0	0	0	0	0	0	0	0	0	0	0	0	0	0	0	0	0	0	0	0	0	0	0	0	0	0	0	0	0	0	0
k__Bacteria;p__Firmicutes;c__Clostridia;o__Clostridiales;f__Lachnospiraceae;g__Coprococcus	0	0	0	0	0	0	0	0	0	0	0	0	0	0	0	0	0	0	0	0	0	0	0	0	0	0	0	0	0	0	0	0	0	0	0	0	0	0	0	0	0	0	0	0	0	0	0	0	0
k__Bacteria;p__Firmicutes;c__Clostridia;o__Clostridiales;f__Lachnospiraceae;g__Dorea	0	0	0	0	0	0	0	0	0	0	0	0	0	0	0	0	0	0	0	0	0	0	0	0	0	0	0	0	0	0	0	0	0	0	0	0	0	0	0	0	0	0	0	0	0	0	0	0	0
k__Bacteria;p__Firmicutes;c__Clostridia;o__Clostridiales;f__Lachnospiraceae;g__Moryella	0	0	0	0	0	0	0	0	0	0	0	0	0	0	0	0	2.33765019402e-05	0	0	0	0	0	0	0	0	0	0	0	0	0	0	0	0	0	0	0	0	0	1.89268477335e-05	0.0140102222061	4.95761241386e-05	0	0	1.81435517817e-05	0.00617304058896	1.68007929974e-05	0	3.49125440771e-05	0.000978258699515
k__Bacteria;p__Firmicutes;c__Clostridia;o__Clostridiales;f__Lachnospiraceae;g__Oribacterium	0	0	0	0	0	0	0	0	4.12099233495e-05	0	0	0	0	0	0	0	0	0	0	0	0	0	0	0	0	5.64365934872e-05	0	0	0	0	0	0	0	0	0	9.171577282e-05	3.48711510967e-05	0.00125186493578	0.000132487934135	0.0661543480625	9.91522482772e-05	0	0	0	0.00346928138641	0.000420019824936	0	0.000314212896694	0.000499111581385
k__Bacteria;p__Firmicutes;c__Clostridia;o__Clostridiales;f__Lachnospiraceae;g__Roseburia	0	0	0	0	0	0	0	0	0	0	0	0	0	0	0	0	0	0	0	0	0	0	0	0	0	0	0	0	0	0	0	0	0	0	0	0	0	0	0	0	0	0	0	0	0	0	0	0	0
k__Bacteria;p__Firmicutes;c__Clostridia;o__Clostridiales;f__Lachnospiraceae;g__Shuttleworthia	0	0	0	0	0	0	0	0	0	0	0	0	0	0	0	0	0	0	0	0	0	0	0	0	0	0	2.12666411467e-05	0	0	0	0	0	0	0	0	0.000756655125765	1.74355755483e-05	1.71488347367e-05	0	0.00074310363577	0	0	0	0	0	0	0	0	0
k__Bacteria;p__Firmicutes;c__Clostridia;o__Clostridiales;f__Lachnospiraceae;g__[Ruminococcus]	0	0	0	0	0	0	0	0	0	0	0	0	0	0	0	0	0	0	0	0	0	0	0	0	0	0	0	0	0	0	0	0	0	0	0	0	0	0	0	0	0	0	0	0	0	0	0	0	0
k__Bacteria;p__Firmicutes;c__Clostridia;o__Clostridiales;f__Peptococcaceae;g__Peptococcus	0	0	0	0	0	0	0	0	0	0	0	0	0	0	0	0	0	0	0	0	0	0	0	0	0	0	0	0	0	0	0	0	0	0	0	0	1.74355755483e-05	0.00015433951263	3.7853695467e-05	7.24979156849e-05	0	0	0	0	8.14385301974e-05	0	0	0.000157106448347	3.99289265108e-05
k__Bacteria;p__Firmicutes;c__Clostridia;o__Clostridiales;f__Peptostreptococcaceae;Other	0	0	0	0	0	0	0	0	0	0	0	0	0	0	0	0	0	0	0	0	0	0	0	0	0	0	0	0	0	0	0	0	0	0	0	0	0	0	0	0	0	0	0	0	4.88631181184e-05	0	0	0	0
k__Bacteria;p__Firmicutes;c__Clostridia;o__Clostridiales;f__Peptostreptococcaceae;g__	0	0	0	0	0	0	0	0	0	0	0	0	0	0	0	1.69857150137e-05	0	0	0	0	0	0	0	0	0	0	0	0	0	0	0	0	2.70102368798e-05	0	0	0	0	6.85953389467e-05	0	0.000833726030377	7.43641862079e-05	0	0	0	0.000211740178513	0	2.886002886e-05	0.000296756624655	0
k__Bacteria;p__Firmicutes;c__Clostridia;o__Clostridiales;f__Peptostreptococcaceae;g__Filifactor	0	0	0	0	0	0	0	0	0	0	0	0	0	0	0	0	2.33765019402e-05	0	0	0	0	0	0	0	0	0	0	0	0	0	0	0	0	0	0	0	0	0.00020578601684	9.46342386675e-05	9.06223946062e-05	0.000223092558624	0	0	0	4.88631181184e-05	5.04023789923e-05	0.00011544011544	0.000314212896694	3.99289265108e-05
k__Bacteria;p__Firmicutes;c__Clostridia;o__Clostridiales;f__Peptostreptococcaceae;g__Peptostreptococcus	0	0	0	0	0	0	0	0	0	0	0	0	0	0	0	0	0	0	0	0	0	0	0	0	0	0	0	0	0	0	0	0	0	2.15178705915e-05	0	0	1.74355755483e-05	0	0	0.00155870518723	0	0	0	0	0.0296273372858	0.000184808722972	0	6.98250881542e-05	7.98578530216e-05
k__Bacteria;p__Firmicutes;c__Clostridia;o__Clostridiales;f__Ruminococcaceae;Other	0	0	0	0	0	0	0	0	0	0	0	0	0	0	0	0	0	0	0	0	0	0	0	0	0	0	0	0	0	0	0	0	0	0	0	0	0	0	0	0	0	0	0	0	0	0	0	0	0
k__Bacteria;p__Firmicutes;c__Clostridia;o__Clostridiales;f__Ruminococcaceae;g__	0	0	0	0	0	0	0	0	0	0	1.66295273888e-05	0	0	0	0	0	0	0	0	0	0	0	0	0	0	0	0	0	0	0	0	0	0	0	0	0	0	0	0	0	0	0	0	0	0	0	0	0	0
k__Bacteria;p__Firmicutes;c__Clostridia;o__Clostridiales;f__Ruminococcaceae;g__Faecalibacterium	0	0	0	0	0	0	0	0	0	0	0	0	0	0	0	0	0	0	0	0	0	0	0	0	0	0	0	0	0	0	0	0	0	0	0	0	0	0	1.89268477335e-05	0	0	0	0	0	0	0	0	0	0
k__Bacteria;p__Firmicutes;c__Clostridia;o__Clostridiales;f__Ruminococcaceae;g__Oscillospira	0	0	0	0	0	0	0	0	0	0	0	0	0	0	0	0	0	0	0	0	0	0	0	0	0	0	0	0	0	0	0	0	0	0	0	0	0	0	0	0	2.47880620693e-05	0	0	0	0	0	0	0	0
k__Bacteria;p__Firmicutes;c__Clostridia;o__Clostridiales;f__Ruminococcaceae;g__Ruminococcus	0	0	0	0	0	0	0	0	0	0	0	0	0	0	0	0	0	0	0	0	0	0	0	0	0	0	0	0	0	0	0	0	0	0	0	0	0	0	0	0	0	0	0	0	0	0	0	0	0
k__Bacteria;p__Firmicutes;c__Clostridia;o__Clostridiales;f__Syntrophomonadaceae;g__Syntrophomonas	0	0	0	0	0	0	0	0	0	0	0	0	0	0	0	0	0	0	0	0	0	0	0	0	0	0	0	0	0	0	0	0	0	0	0	0	0	0	0	0	0	0	0	0	0	0	0	0	5.98933897662e-05
k__Bacteria;p__Firmicutes;c__Clostridia;o__Clostridiales;f__Veillonellaceae;Other	0	0	0	0	0.0011422044546	0.00158286983094	0.000346648722498	0	0	0	0.000299331492999	0	0	0	0	0	0.000490906540745	0.000692041522491	0	0	0.000483949024036	0	0	0	0	0	6.37999234401e-05	0.000264938092799	0	0	6.11072636167e-05	0	0	0	0	0.000206360488845	0.000278969208774	0.000703102224204	0.000529951736538	7.24979156849e-05	0	0	3.70061985383e-05	0.000544306553451	0.000179164766434	0.000235211101964	0	0.00024438780854	5.98933897662e-05
k__Bacteria;p__Firmicutes;c__Clostridia;o__Clostridiales;f__Veillonellaceae;g__	0	0	0	0	0	0	0	0	0	0	0	0	0	0	0	0	2.33765019402e-05	0	0	0	0	0	0	0	0	0	0	0	0	0	0	0	0	0	0	0	1.74355755483e-05	3.42976694734e-05	0	0	0	0	0	0	0	0	0	0	3.99289265108e-05
k__Bacteria;p__Firmicutes;c__Clostridia;o__Clostridiales;f__Veillonellaceae;g__Anaerosinus	0	0	0	0	0	0	0	0	0	0	0	0	0	0	0	0	0	0	0	0	0	0	0	0	0	0	0	0	0	0	0	0	0	0	0	0	0	0	0	0	0	0	0	0	0	0	0	1.74562720385e-05	0
k__Bacteria;p__Firmicutes;c__Clostridia;o__Clostridiales;f__Veillonellaceae;g__Dialister	0	0	0	1.80261379e-05	0	0	0	0	4.12099233495e-05	0	0	0	0	0.00013641013982	0	1.69857150137e-05	2.33765019402e-05	0	0	0	0	0	0	0	0	0	0	7.06501580797e-05	0	2.40401952064e-05	0	1.95936281521e-05	0	2.15178705915e-05	1.92596587188e-05	0.000298076261665	0.00343480838302	0.0613756795226	9.46342386675e-05	0.0331134229891	0.000123940310347	1.86689069355e-05	3.70061985383e-05	0	0.0179653397615	0.00388098318241	0.00011544011544	0.000366581712809	0.000179680169299
k__Bacteria;p__Firmicutes;c__Clostridia;o__Clostridiales;f__Veillonellaceae;g__Megasphaera	0	0	0	0	0	2.19843032075e-05	0	0	0	0	0	0	0	0	0	0	0	0	0	0	0	0	0	0	1.96741953254e-05	0	0	0	0	0	0	0	0	0	0	0	0.00144715277051	1.71488347367e-05	0	0.00726791604741	0	0	0	0	1.62877060395e-05	0.000756035684884	0	5.23688161156e-05	7.98578530216e-05
k__Bacteria;p__Firmicutes;c__Clostridia;o__Clostridiales;f__Veillonellaceae;g__Schwartzia	0	0	0	0	0	0	0	0	0	0	0	0	0	0	0	0	0	0	0	0	0	0	0	0	0	0	0	0	0	0	0	0	0	0	0	2.2928943205e-05	0	5.144650421e-05	1.89268477335e-05	5.43734367637e-05	2.47880620693e-05	0	1.85030992691e-05	0	4.88631181184e-05	8.40039649871e-05	0	3.49125440771e-05	5.98933897662e-05
k__Bacteria;p__Firmicutes;c__Clostridia;o__Clostridiales;f__Veillonellaceae;g__Selenomonas	0	3.98819494297e-05	0	1.80261379e-05	0	2.19843032075e-05	0	0	2.06049616748e-05	0	0	0	0	0	1.97203652212e-05	1.69857150137e-05	2.33765019402e-05	2.47157686604e-05	0	0	0	1.60924349463e-05	0	0	1.96741953254e-05	0	4.25332822934e-05	1.76625395199e-05	0	0	0	0	0	0	1.92596587188e-05	9.171577282e-05	5.2306726645e-05	0.00138905561367	0.000113561086401	0.000453111973031	0.000446185117248	1.86689069355e-05	3.70061985383e-05	3.62871035634e-05	0.000651508241579	0.00236891181264	2.886002886e-05	0.000436406800964	0.000978258699515
k__Bacteria;p__Firmicutes;c__Clostridia;o__Clostridiales;f__Veillonellaceae;g__Veillonella	0	5.98229241445e-05	0.000194208696665	1.80261379e-05	0.53496	0.601117	0.614527	1.6410660365e-05	2.06049616748e-05	6.41056461048e-05	0.304919	2.02478334818e-05	5.6412185032e-05	2.27350233034e-05	5.91610956635e-05	0	0.0976670251064	0.583193	4.45285539352e-05	1.63792115048e-05	0.629327	1.60924349463e-05	2.45960105271e-05	0	0	2.82182967436e-05	0.0398111522266	0.500698	0	0	0.103006	5.87808844564e-05	0	0.000107589352958	0	0.0949258248687	0.46947	0.21045	0.560254	0.108548	0.0388428932626	7.4675627742e-05	0.0207419742807	0.684611	0.277103	0.329564	5.77200577201e-05	0.272876	0.237118
k__Bacteria;p__Firmicutes;c__Clostridia;o__Clostridiales;f__[Acidaminobacteraceae];g__	0	0	0	0	0	0	0	0	0	0	0	0	0	0	0	0	0	0	0	0	0	0	0	0	0	0	0	0	0	0	0	0	0	0	0	0	0	0.00025723252105	1.89268477335e-05	0	2.47880620693e-05	0	0	0	1.62877060395e-05	0	5.77200577201e-05	0	5.98933897662e-05
k__Bacteria;p__Firmicutes;c__Clostridia;o__Clostridiales;f__[Mogibacteriaceae];Other	0	0	0	0	0	0	0	0	0	0	0	0	0	0	0	0	0	0	0	0	0	0	0	0	0	0	0	0	0	0	0	0	0	0	0	0	0	0	0	0	0	0	0	0	0	0	0	0	0
k__Bacteria;p__Firmicutes;c__Clostridia;o__Clostridiales;f__[Mogibacteriaceae];g__	0	0	0	1.80261379e-05	0	0	0	0	0	0	0	0	0	0	0	3.39714300273e-05	0	0	0	0	0	0	0	0	0	0	0	0	0	0	0	0	2.70102368798e-05	0	0	0.000114644716025	0.00010461345329	0.0141649374925	0.000586732279739	0.0158045456193	0.000495761241386	9.33445346775e-05	9.25154963456e-05	5.44306553451e-05	0.000521206593263	0.000554426168915	0.000519480519481	0.00136158921901	0.000239573559065
k__Bacteria;p__Firmicutes;c__Clostridia;o__Clostridiales;f__[Mogibacteriaceae];g__Anaerovorax	0	0	0	0	0	0	0	0	0	0	0	0	0	0	0	0	0	0	0	0	0	0	0	0	0	0	0	0	0	0	0	0	0	0	0	0	0	0	0	0	0	0	0	0	0	0	0	0	0
k__Bacteria;p__Firmicutes;c__Clostridia;o__Clostridiales;f__[Mogibacteriaceae];g__Mogibacterium	0	0	0	0	0	0	0	0	0	0	0	0	0	0	0	0	0	0	0	0	0	0	0	0	0	0	0	0	0	0	0	0	0	0	0	0	0	0.000874590571571	0	0.00541921919745	4.95761241386e-05	0	0	0	0.0037136	0.000537625375918	0	0.00539398805991	0.00618898360918
k__Bacteria;p__Firmicutes;c__Clostridia;o__Clostridiales;f__[Tissierellaceae];g__	0	0	0	0	0	0	0	0	0	0	0	0	0	0	0	0	0	0	0	0	0	0	0	0	0	0	0	0	0	0	0	0	0	0	0	0	0	5.144650421e-05	0	1.81244789212e-05	0.000247880620693	0	0	1.81435517817e-05	1.62877060395e-05	0	5.77200577201e-05	5.23688161156e-05	9.9822316277e-05
k__Bacteria;p__Firmicutes;c__Clostridia;o__Clostridiales;f__[Tissierellaceae];g__Finegoldia	0	0	0	0	0	0	0	0	0	0	0	0	0	0	0	0	0	0	0	0	0	0	0	0	0	0	0	0	0	0	0	0	0	0	0	0	0	0	0	0	0	0	0	0	0	0	0	0	0
k__Bacteria;p__Firmicutes;c__Clostridia;o__Clostridiales;f__[Tissierellaceae];g__Parvimonas	0	0	0	0	0	0	0	0	0	0	0	0	0	0	0	0	0	0	0	0	0	0	0	0	0	0	0	0	0	0	0	0	0	0	0	4.585788641e-05	0.000296404784322	0.00264092054945	0	0.00367926922101	9.91522482772e-05	3.7337813871e-05	1.85030992691e-05	0	0.000830673008014	0.00164647771375	0	0	0
k__Bacteria;p__Firmicutes;c__Clostridia;o__Clostridiales;f__[Tissierellaceae];g__Peptoniphilus	0	0	0	0	0	0	0	0	0	0	0	0	0	0	0	0	0	0	0	0	0	0	0	0	0	0	0	0	0	0	0	0	0	0	0	0	0	0	0	0	0	0	0	0	0	0	0	0	0
k__Bacteria;p__Firmicutes;c__Erysipelotrichi;o__Erysipelotrichales;f__Erysipelotrichaceae;g__	0	0	0	0	0	0	0	0	0	0	0	0	0	0	0	0	0	0	0	0	0	0	0	0	0	0	0	0	0	0	0	0	0	0	0	0	0	0	0	1.81244789212e-05	0	0	0	0	0	0	0	0	0
k__Bacteria;p__Firmicutes;c__Erysipelotrichi;o__Erysipelotrichales;f__Erysipelotrichaceae;g__Bulleidia	0	0	0	3.60522757999e-05	0	0	0	0	0	0	0	0	0	0	0	0	0	0	0	0	0	0	0	0	0	0	0	0.00012363777664	0	0	0	0	0	0	0	2.2928943205e-05	0.000383582662064	8.57441736834e-05	0.000264975868269	0.00159495414507	0	0	0	0	0.0038764740374	0	0	5.23688161156e-05	3.99289265108e-05
k__Bacteria;p__Firmicutes;c__Erysipelotrichi;o__Erysipelotrichales;f__Erysipelotrichaceae;g__Catenibacterium	0	0	0	0	0	0	0	0	0	0	0	0	0	0	0	0	0	0	0	0	0	0	0	0	0	0	0	0	0	0	0	0	0	0	0	0	0	0	0	0	0	0	0	0	0	0	0	0	0
k__Bacteria;p__Firmicutes;c__Erysipelotrichi;o__Erysipelotrichales;f__Erysipelotrichaceae;g__RFN20	0	0	0	0	0	0	0	0	0	0	0	0	0	0	0	0	0	0	0	0	0	0	0	0	0	0	0	0	0	0	0	0	0	0	0	0	0	0	0	0	0	0	0	0	0	0	0	0	0
k__Bacteria;p__Firmicutes;c__Erysipelotrichi;o__Erysipelotrichales;f__Erysipelotrichaceae;g__Sharpea	0	0	0	0	0	0	0	0	0	0	0	0	0	0	0	0	0	0	0	0	0	0	0	0	0	0	0	0	0	0	0	0	0	0	0	0	0	0.000120041843157	0	0.000235618225976	0	0	0	5.44306553451e-05	4.88631181184e-05	0	2.886002886e-05	0.00024438780854	0
k__Bacteria;p__Fusobacteria;c__Fusobacteriia;o__Fusobacteriales;Other;Other	0	0	0	0	0	0	0	0	0	0	0	0	0	0	0	0	0	0	0	0	0	0	0	0	0	0	0	0	0	0	0	0	0	0	0	0	0	0	0	0	0	0	0	0	0	0	0	0	0
k__Bacteria;p__Fusobacteria;c__Fusobacteriia;o__Fusobacteriales;f__Fusobacteriaceae;Other	0	0	0	0	0	0	0	0	0	0	0	0	0	0	0	0	0	0	0	0	0	0	0	0	0	0	0	0	0	0	0	0	0	0	0	0.00013757365923	0	0	0	3.62489578425e-05	0	0	0	0	1.62877060395e-05	5.04023789923e-05	0	0	0
k__Bacteria;p__Fusobacteria;c__Fusobacteriia;o__Fusobacteriales;f__Fusobacteriaceae;g__	0	0	1.94208696665e-05	0	0	0	0	0	0	0	0	0	0	0	0	0	0	0	0	0	1.61316341345e-05	0	0	0	0	0	0	0	0	0	0	0	0	0	0	6.8786829615e-05	1.74355755483e-05	3.42976694734e-05	0	0.000181244789212	0	0	0	0	0.000146589354355	0.000117605550982	0	1.74562720385e-05	0
k__Bacteria;p__Fusobacteria;c__Fusobacteriia;o__Fusobacteriales;f__Fusobacteriaceae;g__Fusobacterium	3.426946077e-05	0.000179468772434	0.000699151307996	7.21045515998e-05	2.03965081178e-05	0	0.000305866519851	0	2.06049616748e-05	1.60264115262e-05	1.66295273888e-05	2.02478334818e-05	0	2.27350233034e-05	7.88814608847e-05	3.39714300273e-05	4.67530038805e-05	0.0251606524963	0	0	0.000822713340861	0	0	3.19417382694e-05	3.93483906508e-05	0.000112873186974	4.25332822934e-05	0.000476888567038	0.000202383060538	0.000144241171238	2.03690878722e-05	0.000293904422282	0.000135051184399	0.000408839541239	5.77789761565e-05	0.131062	0.0201904	0.0120899284894	0.000132487934135	0.207108	0.00689108125527	0.000149351255484	0.000148024794153	7.25742071268e-05	0.1132	0.165773	0.00025974025974	0.0038927486646	0.000379324801853
k__Bacteria;p__Fusobacteria;c__Fusobacteriia;o__Fusobacteriales;f__Leptotrichiaceae;Other	0	0	0	0	0	0	0	0	0	0	0	0	0	0	0	0	0	0	0	0	0	0	0	0	0	0	0	0	0	0	0	0	0	0	0	0	0	0	0	0	0	0	0	0	1.62877060395e-05	0	2.886002886e-05	0	0
k__Bacteria;p__Fusobacteria;c__Fusobacteriia;o__Fusobacteriales;f__Leptotrichiaceae;g__	0	0	0	0	0	0	0	0	0	1.60264115262e-05	0	0	0	0	0	0	0	0	0	0	0	0	0	0	0	0	0	0	0	0	0	0	0	0	0	0	3.48711510967e-05	1.71488347367e-05	3.7853695467e-05	1.81244789212e-05	0	0	0	0	0	0	2.886002886e-05	0	7.98578530216e-05
k__Bacteria;p__Fusobacteria;c__Fusobacteriia;o__Fusobacteriales;f__Leptotrichiaceae;g__Leptotrichia	3.426946077e-05	5.98229241445e-05	0	0	0	2.19843032075e-05	0	4.92319810949e-05	4.12099233495e-05	1.60264115262e-05	8.31476369442e-05	2.02478334818e-05	0	0	9.86018261058e-05	1.69857150137e-05	0	0.000840336134454	0	0	0	1.60924349463e-05	0	3.19417382694e-05	0	0	2.12666411467e-05	0.00010597523712	5.05957651345e-05	0	2.03690878722e-05	0	8.10307106393e-05	2.15178705915e-05	0	9.171577282e-05	0.00111587683509	1.71488347367e-05	7.5707390934e-05	0.000978721861746	0.000297456744832	0.000168020162419	1.85030992691e-05	1.81435517817e-05	0.00307837644146	0.0527712908049	0.00470418470418	0.00024438780854	0.000179680169299
k__Bacteria;p__Fusobacteria;c__Fusobacteriia;o__Fusobacteriales;f__Leptotrichiaceae;g__Sebaldella	0	0	0	0	0	0	0	0	0	0	0	0	0	0	0	0	0	0	0	0	0	0	0	0	0	0	0	0	0	0	0	0	0	0	0	0	0	0	0	0	0	0	0	0	1.62877060395e-05	0	0	0	0
k__Bacteria;p__Fusobacteria;c__Fusobacteriia;o__Fusobacteriales;f__Leptotrichiaceae;g__Streptobacillus	0	0	0	0	0	0	0	0	0	0	0	0	0	0	0	0	0	0	0	0	0	0	0	0	0	0	0	0	0	0	0	0	0	0	0	0	0	0	0	0	0	0	0	0	0	8.40039649871e-05	0	0	0
k__Bacteria;p__GN02;c__BD1-5;o__;f__;g__	0	0	0	0	0	0	0	0	0	0	0	0	0	0	0	0	0	0	0	0	0	0	0	0	0	0	0	0	0	0	0	0	0	0	0	0	0	0	0	0	0	0	0	0	0	0	0	0	0
k__Bacteria;p__Gemmatimonadetes;c__Gemm-1;o__;f__;g__	0	3.98819494297e-05	0	0	0	0	0	0	0	0	0	0	0	0	0	0	0	0	0	0	0	0	0	0	0	0	0	0	0	0	0	0	0	0	0	0	0	0	0	0	0	0	0	0	0	0	0	0	0
k__Bacteria;p__Gemmatimonadetes;c__Gemmatimonadetes;o__;f__;g__	0	1.99409747148e-05	0	0	0	0	0	0	0	0	0	0	0	0	0	0	0	0	0	0	0	0	0	0	0	0	0	0	0	0	0	0	0	0	0	0	0	0	0	0	0	0	0	0	0	0	0	0	0
k__Bacteria;p__Nitrospirae;c__Nitrospira;o__Nitrospirales;f__Nitrospiraceae;g__Nitrospira	0	0	0	0	0	0	0	0	0	0	0	0	0	0	0	0	0	0	0	0	0	0	0	0	0	0	0	0	0	0	0	0	0	0	0	0	0	0	0	0	0	0	0	0	0	0	0	0	0
k__Bacteria;p__Nitrospirae;c__Nitrospira;o__Nitrospirales;f__[Thermodesulfovibrionaceae];g__GOUTA19	0	0	0	0	0	0	0	0	0	0	0	0	0	0	0	0	0	0	0	0	0	0	0	0	0	0	0	0	0	0	0	0	0	0	0	0	0	0	0	0	0	0	0	0	0	0	0	0	1.99644632554e-05
k__Bacteria;p__Proteobacteria;c__Alphaproteobacteria;Other;Other;Other	0	0	0	0	0	0	0	0	0	0	0	0	0	0	0	0	0	0	0	0	0	0	0	0	0	0	0	0	0	0	0	0	0	0	0	0	0	0	0	0	0	0	0	0	0	0	2.886002886e-05	0	0
k__Bacteria;p__Proteobacteria;c__Alphaproteobacteria;o__Caulobacterales;f__Caulobacteraceae;g__	0	0	0	0	0	0	0	1.6410660365e-05	0	0	0	0	0	0	0	0	0	0	0	0	0	0	0	0	0	0	0	0	0	0	0	0	0	2.15178705915e-05	0	0	0	0	0	0	0	0	0	0	0	0	0	0	0
k__Bacteria;p__Proteobacteria;c__Alphaproteobacteria;o__Caulobacterales;f__Caulobacteraceae;g__Brevundimonas	0	0	3.88417393331e-05	0	0	0	0	0	0	0	0	0	0	0	0	0	0	0	0	0	0	0	0	0	0	0	0	0	0	0	0	0	0	0	0	0	0	0	0	3.62489578425e-05	0	0	0	0	0	0	0	0	0
k__Bacteria;p__Proteobacteria;c__Alphaproteobacteria;o__Rhizobiales;Other;Other	0	0	3.88417393331e-05	0	0	0	0	0	0	0	0	0	0	0	0	0	0	0	0	1.63792115048e-05	0	0	0	0	0	0	0	0	0	0	0	0	0	0	0	0	0	0	0	0	0	0	0	0	0	0	0	0	0
k__Bacteria;p__Proteobacteria;c__Alphaproteobacteria;o__Rhizobiales;f__Bradyrhizobiaceae;g__	0	0	0	0	0	0	0	0	0	0	0	0	0	0	0	0	0	0	0	0	0	0	0	0	0	0	0	0	0	0	0	0	0	0	0	0	0	0	0	0	0	0	0	0	0	0	0	0	0
k__Bacteria;p__Proteobacteria;c__Alphaproteobacteria;o__Rhizobiales;f__Bradyrhizobiaceae;g__Bradyrhizobium	0	0	0	0	0	0	0	0	0	0	0	0	0	0	0	0	0	0	0	0	0	0	0	0	0	0	0	0	0	0	0	0	0	0	0	0	0	0	0	0	0	0	0	0	0	0	0	0	0
k__Bacteria;p__Proteobacteria;c__Alphaproteobacteria;o__Rhizobiales;f__Hyphomicrobiaceae;Other	0	0	5.82626089996e-05	0	0	0	0	0	0	0	0	0	0	0	0	0	0	0	0	0	0	0	0	0	0	0	0	0	0	0	0	0	0	0	0	0	0	0	0	0	0	0	0	0	0	0	0	0	0
k__Bacteria;p__Proteobacteria;c__Alphaproteobacteria;o__Rhizobiales;f__Hyphomicrobiaceae;g__Devosia	0	0	0.00353459827931	0	0	0	0	0	0	0	0	0	0	0	0	0	0	0	0	0	1.61316341345e-05	0	0	1.59708691347e-05	0	0	0	0	0.000101191530269	0	0	0	0	0.000107589352958	0	0	1.74355755483e-05	0	1.89268477335e-05	0	0	0	0	0	0	0	2.886002886e-05	0	5.98933897662e-05
k__Bacteria;p__Proteobacteria;c__Alphaproteobacteria;o__Rhizobiales;f__Methylobacteriaceae;g__	0	0	1.94208696665e-05	0	0	0	0	0	0	0	9.9777164333e-05	0	0	0	0	1.69857150137e-05	0	0	0	0	0	0	0	0	0	0	0	0	0	0	0	0	0	0	0	0	0	0	0	1.81244789212e-05	0.000297456744832	0	0	0	0	0	0	0	0
k__Bacteria;p__Proteobacteria;c__Alphaproteobacteria;o__Rhizobiales;f__Methylocystaceae;g__Methylosinus	0	0	0	0	0	0	0	0	0	0	0	0	0	0	0	0	0	0	0	0	0	0	0	0	0	0	0	0	0	0	0	0	0	0	0	0	0	0	0	0	0	0	0	0	0	0	0	0	0
k__Bacteria;p__Proteobacteria;c__Alphaproteobacteria;o__Rhizobiales;f__Phyllobacteriaceae;Other	0	0	0.000155366957332	0	0	0	0	0	0	0	0	2.02478334818e-05	0	0	0	0	0	0	0	1.63792115048e-05	0	0	0	0	0	0	0	0	7.58936477017e-05	0	0	0	2.70102368798e-05	0	0	0	0	0	0	0	0	0	0	0	0	0	0	0	0
k__Bacteria;p__Proteobacteria;c__Alphaproteobacteria;o__Rhizobiales;f__Phyllobacteriaceae;g__	0	3.98819494297e-05	0.000310733914665	0	0	0	2.03911013234e-05	1.6410660365e-05	0	0	3.32590547777e-05	4.04956669636e-05	1.88040616773e-05	2.27350233034e-05	1.97203652212e-05	0	0	0	0	0	0	0	0	0	0	2.82182967436e-05	0	0	0.000683042829315	2.40401952064e-05	0	0	8.10307106393e-05	0.000236696576507	0	0	1.74355755483e-05	0	1.89268477335e-05	0	0	0	0	1.81435517817e-05	0	0	0	0	0.000519076044641
k__Bacteria;p__Proteobacteria;c__Alphaproteobacteria;o__Rhizobiales;f__Phyllobacteriaceae;g__Aminobacter	0	0	0	0	0	0	0	0	0	0	0	0	0	0	0	0	0	0	0	0	0	0	0	0	0	0	0	0	0	0	0	0	0	0	0	0	0	0	0	1.81244789212e-05	0	0	0	0	0	0	0	0	0
k__Bacteria;p__Proteobacteria;c__Alphaproteobacteria;o__Rhizobiales;f__Phyllobacteriaceae;g__Hoeflea	0	0	0	0	0	0	0	0	0	0	0	0	0	0	0	0	0	0	0	0	0	0	0	0	0	0	0	0	0	0	0	0	0	0	0	0	0	0	0	0	0	0	0	0	0	0	0	0	1.99644632554e-05
k__Bacteria;p__Proteobacteria;c__Alphaproteobacteria;o__Rhizobiales;f__Phyllobacteriaceae;g__Mesorhizobium	0	0	0	0	0	0	0	0	0	0	0	0	0	0	0	0	0	0	0	0	0	0	0	0	0	0	0	0	0	0	0	0	0	0	0	0	0	0	0	0	0	0	0	0	0	0	0	0	0
k__Bacteria;p__Proteobacteria;c__Alphaproteobacteria;o__Rhizobiales;f__Phyllobacteriaceae;g__Phyllobacterium	0	0	0	0	0	0	0	0	0	0	0	0	0	0	0	0	0	0	0	0	0	0	0	0	0	0	0	0	0	0	0	0	0	0	0	0	0	0	0	0	0	0	0	0	0	0	0	0	0
k__Bacteria;p__Proteobacteria;c__Alphaproteobacteria;o__Rhizobiales;f__Rhizobiaceae;Other	0	0	3.88417393331e-05	0	0	0	0	0	0	0	0	0	0	0	0	0	0	0	0	0	0	0	0	0	0	0	0	0	0	0	0	0	0	0	0	0	0	0	0	0	0	0	0	0	0	0	0	0	0
k__Bacteria;p__Proteobacteria;c__Alphaproteobacteria;o__Rhodobacterales;f__Rhodobacteraceae;Other	0	0	0	0	0	0	0	0	0	0	0	0	0	0	0	0	0	0	0	0	0	0	0	0	0	0	0	0	2.52978825672e-05	0	0	0	0	0	0	0	0	0	0	0	0	0	0	0	0	0	0	0	0
k__Bacteria;p__Proteobacteria;c__Alphaproteobacteria;o__Rhodobacterales;f__Rhodobacteraceae;g__Rhodobacter	0	0	0	0	0	0	0	0	0	0	0	0	0	0	0	0	0	0	0	0	0	0	0	0	0	0	0	0	0	0	0	0	0	0	0	0	0	0	0	0	0	0	0	0	0	0	0	0	1.99644632554e-05
k__Bacteria;p__Proteobacteria;c__Alphaproteobacteria;o__Rhodobacterales;f__Rhodobacteraceae;g__Rubellimicrobium	0	0	0	0	0	0	0	0	0	0	0	0	0	0	0	0	0	0	0	0	0	0	0	0	0	0	0	0	0	0	0	0	0	0	0	0	0	0	0	0	0	0	0	0	0	0	0	0	0
k__Bacteria;p__Proteobacteria;c__Alphaproteobacteria;o__Rhodospirillales;f__Acetobacteraceae;g__	0	0	0	0	0	0	0	0	0	0	0	0	0	0	0	0	0	0	0	0	0	0	0	0	0	0	0	0	0	0	0	0	0	0	0	0	0	0	0	0	0	0	0	0	0	0	0	0	0
k__Bacteria;p__Proteobacteria;c__Alphaproteobacteria;o__Rhodospirillales;f__Acetobacteraceae;g__Roseomonas	0	0	9.71043483327e-05	0	0	0	0	0	0	0	0	0	0	0	0	0	0	0	0	0	0	0	0	0	0	0	0	0	0	0	0	0	0	0	0	0	0	0	0	0	0	0	0	0	0	0	0	0	0
k__Bacteria;p__Proteobacteria;c__Alphaproteobacteria;o__Rhodospirillales;f__Rhodospirillaceae;g__	0	0	0	0	0	0	0	0	0	0	0	0	0	0	0	0	0	0	0	0	0	0	0	0	0	0	0	0	0	0	0	0	0	0	0	0	0	0	0	0	0	0	0	0	0	0	0	0	0
k__Bacteria;p__Proteobacteria;c__Alphaproteobacteria;o__Sphingomonadales;f__Sphingomonadaceae;g__Blastomonas	0	0	0	0	0	0	0	0	0	0	0	0	0	0	0	0	0	0	0	0	0	0	0	0	0	0	0	0	0	0	0	0	0	0	0	0	0	0	0	0	0	0	0	0	0	0	0	0	0
k__Bacteria;p__Proteobacteria;c__Alphaproteobacteria;o__Sphingomonadales;f__Sphingomonadaceae;g__Novosphingobium	0	0	0	0	0	0	0	0	0	0	1.66295273888e-05	0	0	0	0	0	0	0	0	0	0	0	0	0	0	0	0	0	0	0	0	0	0	0	0	0	0	0	0	3.62489578425e-05	0	0	0	0	0	0	0	0	0
k__Bacteria;p__Proteobacteria;c__Alphaproteobacteria;o__Sphingomonadales;f__Sphingomonadaceae;g__Sphingobium	0	0	0	0	0	0	0	0	0	0	4.98885821665e-05	0	0	0	0	0	0	0	0	0	0	0	0	0	0	2.82182967436e-05	0	0	0	0	0	0	0	0	1.92596587188e-05	0	0	0	0	0.000108746873527	0	0	0	0	0	0	0	0	1.99644632554e-05
k__Bacteria;p__Proteobacteria;c__Alphaproteobacteria;o__Sphingomonadales;f__Sphingomonadaceae;g__Sphingomonas	0	0	0	0	0	0	0	0	0	0	0	2.02478334818e-05	0	0	0	0	0	0	0	0	0	0	0	0	0	2.82182967436e-05	0	0	5.05957651345e-05	0	0	0	0	0	0	0	0	0	0	0	0	0	0	0	0	0	0	0	3.99289265108e-05
k__Bacteria;p__Proteobacteria;c__Alphaproteobacteria;o__Sphingomonadales;f__Sphingomonadaceae;g__Sphingopyxis	0	0	0	0	0	0	0	0	0	0	0	0	0	0	0	0	0	0	0	0	0	0	0	0	0	0	0	0	0	0	0	0	0	0	0	0	0	0	0	0	0	0	0	0	0	0	0	0	0
k__Bacteria;p__Proteobacteria;c__Betaproteobacteria;o__Burkholderiales;Other;Other	0	0	1.94208696665e-05	0	0	0	0	0	0	0	0	0	0	0	0	0	0	0	0	0	0	0	0	0	0	0	0	0	0	0	0	0	0	0	0	0	0	0	0	0	2.47880620693e-05	0	0	0	0	0	0	0	0
k__Bacteria;p__Proteobacteria;c__Betaproteobacteria;o__Burkholderiales;f__Alcaligenaceae;g__Achromobacter	0	0	0	0	0	0	0	0	0	1.60264115262e-05	0	0	0	0	0	0	0	0	0	0	0	0	0	0	0	0	0	0	0	0	0	0	2.70102368798e-05	0	0	0	0	0	0	0	0	0	0	0	0	0	0	0	0
k__Bacteria;p__Proteobacteria;c__Betaproteobacteria;o__Burkholderiales;f__Alcaligenaceae;g__Sutterella	0	0	0	0	0	0	0	0	0	0	0	0	0	0	0	0	0	0	0	0	0	0	0	0	0	0	0	0	0	0	0	0	0	0	0	0	0	0	0	0	0	0	0	0	0	0	0	0	0
k__Bacteria;p__Proteobacteria;c__Betaproteobacteria;o__Burkholderiales;f__Burkholderiaceae;g__Burkholderia	0	0	0	0	0	0	0	0	0	0	0	0	0	0	0	0	0	0	0	0	0	0	0	1.59708691347e-05	0	0	0	0	0.000202383060538	0	0	0	0	0	0	0	0	0	0	0	0	0	0	0	0	0	0	0	0
k__Bacteria;p__Proteobacteria;c__Betaproteobacteria;o__Burkholderiales;f__Burkholderiaceae;g__Lautropia	1.7134730385e-05	0	0	0	0	0	0	0	0	0	0	0	0	0	0	0	0	0	0	0	0	1.60924349463e-05	0	0	0	0	0	0	2.52978825672e-05	2.40401952064e-05	0	0	0	0	0	0.000114644716025	5.2306726645e-05	1.71488347367e-05	3.7853695467e-05	3.62489578425e-05	0.000644489613802	0	3.70061985383e-05	0	0	1.68007929974e-05	2.886002886e-05	0.000139650176308	0
k__Bacteria;p__Proteobacteria;c__Betaproteobacteria;o__Burkholderiales;f__Comamonadaceae;Other	0	1.99409747148e-05	0	0	0	0	0	0	0	1.60264115262e-05	0	0	0	0	0	0	0	0	2.22642769676e-05	0	0	1.60924349463e-05	0	0	0	0	0	0	2.52978825672e-05	0	0	0	0	0	0	2.2928943205e-05	0	1.71488347367e-05	3.7853695467e-05	3.62489578425e-05	0	0	0	0	0	1.68007929974e-05	0	1.74562720385e-05	0
k__Bacteria;p__Proteobacteria;c__Betaproteobacteria;o__Burkholderiales;f__Comamonadaceae;g__	0	0	0	0	0	0	0	0	0	0	0	0	0	0	0	0	0	0	0	0	0	0	0	0	0	0	0	0	0	0	0	0	0	0	0	0	0	0	0	0	0	0	0	0	0	0	0	0	0
k__Bacteria;p__Proteobacteria;c__Betaproteobacteria;o__Burkholderiales;f__Comamonadaceae;g__Aquabacterium	0	0	0	0	0	0	0	0	0	0	4.98885821665e-05	0	0	0	0	0	0	0	0	0	0	0	0	0	0	0	0	0	0	0	0	0	0	0	1.92596587188e-05	0	0	0	0	1.81244789212e-05	0	0	0	0	0	0	0	1.74562720385e-05	1.99644632554e-05
k__Bacteria;p__Proteobacteria;c__Betaproteobacteria;o__Burkholderiales;f__Comamonadaceae;g__Delftia	0	0	0	0	0	0	0	0	0	0	0	0	0	0	0	0	0	0	0	0	0	0	0	0	0	0	0	0	0	0	0	0	0	0	0	0	0	0	0	7.24979156849e-05	0	0	0	0	0	0	0	0	0
k__Bacteria;p__Proteobacteria;c__Betaproteobacteria;o__Burkholderiales;f__Comamonadaceae;g__Diaphorobacter	0	0	0	0	0	0	0	0	0	0	0	0	0	0	0	0	0	0	0	0	0	0	0	0	0	0	0	0	0	0	0	0	0	0	0	0	0	0	0	0	0	0	0	0	0	0	0	0	0
k__Bacteria;p__Proteobacteria;c__Betaproteobacteria;o__Burkholderiales;f__Comamonadaceae;g__Hylemonella	0	0	0	0	0	0	0	0	0	0	0	0	0	0	0	0	0	0	0	0	0	0	0	0	0	0	0	0	0	0	0	0	0	0	0	0	0	0	0	0	0	0	0	0	0	0	0	0	0
k__Bacteria;p__Proteobacteria;c__Betaproteobacteria;o__Burkholderiales;f__Comamonadaceae;g__Roseateles	0	0	0	0	0	0	0	0	0	0	0	0	0	0	0	0	0	0	0	0	0	0	0	0	0	0	0	0	0	0	0	0	0	0	0	0	0	0	0	0	0	0	0	0	0	0	0	0	0
k__Bacteria;p__Proteobacteria;c__Betaproteobacteria;o__Burkholderiales;f__Oxalobacteraceae;Other	0	0	0	0	0	0	0	0	0	0	0	0	0	0	0	0	0	0	0	0	0	0	0	0	0	0	0	0	0	0	0	0	0	0	0	0	0	0	0	0	0	0	0	0	0	0	0	0	0
k__Bacteria;p__Proteobacteria;c__Betaproteobacteria;o__Burkholderiales;f__Oxalobacteraceae;g__	1.7134730385e-05	1.99409747148e-05	0	0	0	0	0	0	0	0	0	0	0	0	0	0	0	0	0	0	0	0	0	0	0	0	0	0	0	0	0	0	0	0	0	0	0	0	0	0	0	0	0	0	0	0	0	0	0
k__Bacteria;p__Proteobacteria;c__Betaproteobacteria;o__Burkholderiales;f__Oxalobacteraceae;g__Janthinobacterium	0	0	0	0	0	0	0	0	0	0	0	0	0	0	0	0	0	0	0	0	0	0	0	0	0	0	0	0	0	0	0	0	0	0	0	0	0	0	0	0.000453111973031	0	0	0	0	0	0	0	0	0
k__Bacteria;p__Proteobacteria;c__Betaproteobacteria;o__Burkholderiales;f__Oxalobacteraceae;g__Ralstonia	0	0	0.00120409391933	0	0	0	0	0	0	0	0	0	0	0	0	0	0	0	0	0	0	0	0	0	0	0	0	0	0	0	0	0	0	4.30357411831e-05	0	0	0	0	0	0	0	0	0	0	0	0	0	0	0
k__Bacteria;p__Proteobacteria;c__Betaproteobacteria;o__MND1;f__;g__	0	0	0	0	0	0	0	0	0	0	0	0	0	0	0	0	0	0	0	0	0	0	0	0	0	0	0	0	0	0	0	0	0	0	0	0	0	0	0	0	0	0	0	0	0	0	0	0	0
k__Bacteria;p__Proteobacteria;c__Betaproteobacteria;o__Neisseriales;f__Neisseriaceae;Other	3.426946077e-05	5.98229241445e-05	0	3.60522757999e-05	0	0	0	0	0	0	3.32590547777e-05	0	0	0	1.97203652212e-05	1.69857150137e-05	0	9.88630746416e-05	2.22642769676e-05	4.91376345143e-05	1.61316341345e-05	1.60924349463e-05	0	0	1.96741953254e-05	5.64365934872e-05	0	0	0	0	0	0	0	0	0	0	8.71778777417e-05	1.71488347367e-05	0	7.24979156849e-05	0	3.7337813871e-05	0	0	1.62877060395e-05	0	2.886002886e-05	6.98250881542e-05	0
k__Bacteria;p__Proteobacteria;c__Betaproteobacteria;o__Neisseriales;f__Neisseriaceae;g__	0	0	0	0	0	0	0	0	0	0	0	0	0	0	0	0	0	0	0	0	0	0	0	0	0	0	0	0	0	0	0	0	0	0	0	0	8.71778777417e-05	0	0	0.000181244789212	0	0	0	0	0	0	0	0.000226931536501	0
k__Bacteria;p__Proteobacteria;c__Betaproteobacteria;o__Neisseriales;f__Neisseriaceae;g__Eikenella	0.0126797004849	0.0224535375289	0.00130119826766	0.0430464173051	0.000163172064942	0	0	0.0395989234607	0.00214291601418	0	0.0264409485482	0	0	0	0.0556114299237	0.0161704	0	0.0343054869006	0.0278303462095	0.0911176	0.0187772221326	0	0	4.79126074041e-05	0.00761391359093	0.0685986793837	0	0.00904322023421	0	0.00026444214727	2.03690878722e-05	0	0	0	0.00358229652171	0	0.0205739791471	0.00171488347367	1.89268477335e-05	0.00250117809113	2.47880620693e-05	0.0407355549333	0.00951059302433	0	0.00190566160662	0.000638430133902	0.0198268398268	0.0443214747059	3.99289265108e-05
k__Bacteria;p__Proteobacteria;c__Betaproteobacteria;o__Neisseriales;f__Neisseriaceae;g__Kingella	0	1.99409747148e-05	0	1.80261379e-05	2.03965081178e-05	0	0	8.20533018249e-05	4.12099233495e-05	1.60264115262e-05	0.000216183856055	0	1.88040616773e-05	0	1.97203652212e-05	5.0957145041e-05	0	2.47157686604e-05	2.22642769676e-05	0.00031120501859	4.83949024036e-05	0	0	0	3.93483906508e-05	0.000479711044641	2.12666411467e-05	1.76625395199e-05	2.52978825672e-05	0	2.03690878722e-05	0	0	0	0	0.000114644716025	0.000348711510967	8.57441736834e-05	5.67805432005e-05	0.00074310363577	0	5.60067208065e-05	5.55092978074e-05	0	3.2575412079e-05	0.000100804757985	0.0002886002886	0.00104737632231	3.99289265108e-05
k__Bacteria;p__Proteobacteria;c__Betaproteobacteria;o__Neisseriales;f__Neisseriaceae;g__Neisseria	0	0.00121639945761	0	0	0	2.19843032075e-05	0	0	2.06049616748e-05	1.60264115262e-05	0	0	0	0	1.97203652212e-05	5.0957145041e-05	2.33765019402e-05	0	8.90571078704e-05	6.5516846019e-05	3.22632682691e-05	0	0	0	1.96741953254e-05	0.000112873186974	0	0	0	0	0	0	0	0	0	0.000343934148075	0.0177842870593	0.0499374067532	0.000435317497871	0.00561858846558	0.000123940310347	0.000130682348548	0.00020353409196	0	4.88631181184e-05	0.000285613480956	0.00112554112554	0.0045735432741	1.99644632554e-05
k__Bacteria;p__Proteobacteria;c__Betaproteobacteria;o__Neisseriales;f__Neisseriaceae;g__Vogesella	0	0	0	0	0	0	0	0	0	0	0	0	0	0	0	0	0	0	0	0	0	0	0	0	0	0	0	0	0	0	0	0	0	0	0	0	0	0	0	0	0	0	0	0	0	0	0	0	0
k__Bacteria;p__Proteobacteria;c__Betaproteobacteria;o__Rhodocyclales;f__Rhodocyclaceae;g__Dechloromonas	0	0	0	0	0	0	0	0	0	0	0	0	0	0	0	0	0	0	0	0	0	0	0	0	0	0	0	0	0	0	0	0	0	0	0	0	0	0	0	0	0	0	0	0	0	0	0	0	0
k__Bacteria;p__Proteobacteria;c__Betaproteobacteria;o__Rhodocyclales;f__Rhodocyclaceae;g__Methyloversatilis	0	0	0	0	0	0	0	0	0	0	1.66295273888e-05	0	0	0	0	0	0	0	0	0	0	0	0	0	0	0	0	0	0	0	0	0	0	0	0	0	0	0	0	0	0	0	0	0	0	0	0	0	0
k__Bacteria;p__Proteobacteria;c__Betaproteobacteria;o__Rhodocyclales;f__Rhodocyclaceae;g__Propionivibrio	0	0	0	0	0	0	0	0	0	0	0	0	0	0	0	0	0	0	0	0	0	0	0	0	0	0	0	0	0	0	0	1.95936281521e-05	0	0	0	0	0	0	0	0	0	0	0	0	0	0	0	0	0
k__Bacteria;p__Proteobacteria;c__Deltaproteobacteria;Other;Other;Other	0	0	0	0	0	0	0	0	0	0	0	0	0	0	0	0	0	0	0	0	0	0	0	0	0	0	0	0	0	0	0	1.95936281521e-05	0	0	0	0	0	0	0	0	0	0	0	0	0	0	0	0	0
k__Bacteria;p__Proteobacteria;c__Deltaproteobacteria;o__Desulfobacterales;f__Desulfobulbaceae;g__Desulfobulbus	0	0	0	0	0	0	0	0	0	0	0	0	0	0	0	0	0	0	0	0	0	0	0	0	0	0	0	0	0	0	0	0	0	0	0	6.8786829615e-05	1.74355755483e-05	3.42976694734e-05	1.89268477335e-05	3.62489578425e-05	0.000173516434485	1.86689069355e-05	0	3.62871035634e-05	0	6.72031719897e-05	8.65800865801e-05	6.98250881542e-05	3.99289265108e-05
k__Bacteria;p__Proteobacteria;c__Deltaproteobacteria;o__Desulfovibrionales;f__Desulfomicrobiaceae;g__Desulfomicrobium	0	0	0	0	0	0	0	0	0	0	0	0	0	0	0	0	0	0	0	0	0	0	0	0	0	0	0	0	0	0	0	0	0	0	0	0	0	0	0	0	0	0	0	0	0	0	0	0	0
k__Bacteria;p__Proteobacteria;c__Deltaproteobacteria;o__Desulfovibrionales;f__Desulfovibrionaceae;g__	0	0	0	0	0	0	0	0	0	0	0	0	0	0	0	0	0	0	0	0	0	0	0	0	0	0	0	0	0.000177085177971	0	0	0	0	0	0	0	0	0	0	0	0	0	0	0	0	0	0	0	0
k__Bacteria;p__Proteobacteria;c__Deltaproteobacteria;o__Desulfovibrionales;f__Desulfovibrionaceae;g__Desulfovibrio	0	0	0	0	0	0	0	0	0	0	0	0	0	0	0	0	0	0	0	0	0	0	0	0	0	0	0	0	0	0	0	0	0	0	0	0	0	0	0	0	9.91522482772e-05	0	1.85030992691e-05	0	1.62877060395e-05	0	0	0	0
k__Bacteria;p__Proteobacteria;c__Deltaproteobacteria;o__GMD14H09;f__;g__	0	0	0	0	0	0	0	0	0	0	0	0	0	0	0	0	0	0	0	0	0	0	0	0	0	0	0	0	0	0	0	0	0	0	0	0	0	0	0	0	0	0	0	0	0	0	0	0	0
k__Bacteria;p__Proteobacteria;c__Deltaproteobacteria;o__Myxococcales;f__;g__	0	3.98819494297e-05	0	0	0	0	0	0	0	0	0	0	0	0	0	0	0	0	0	0	0	0	0	0	0	0	0	0	0	0	0	0	0	0	0	0	0	0	0	0	0	0	0	0	0	0	0	0	0
k__Bacteria;p__Proteobacteria;c__Epsilonproteobacteria;o__Campylobacterales;f__;g__	0	0	0	0	0	0	0	0	0	0	0	0	0	0	0	0	0	0	0	0	0	0	0	0	0	0	0	0	0	0	0	0	0	0	0	0	0	0	0	0	0	0	0	0	0	0	0	0	0
k__Bacteria;p__Proteobacteria;c__Epsilonproteobacteria;o__Campylobacterales;f__Campylobacteraceae;g__Campylobacter	1.7134730385e-05	3.98819494297e-05	5.82626089996e-05	5.40784136999e-05	2.03965081178e-05	0	0.000754470748965	0	0	0	0	0	0	0	1.97203652212e-05	3.39714300273e-05	0	4.94315373208e-05	0	1.63792115048e-05	0.00500080658171	0	0	1.59708691347e-05	0	2.82182967436e-05	0	0	0	4.80803904128e-05	0	0	0	0	0	0.000940086671405	0.0145412700073	0.00396138082417	5.67805432005e-05	0.0421212890129	0.000247880620693	9.33445346775e-05	0.00582847626978	3.62871035634e-05	0.00798097595935	0.00226810705465	0.0226551226551	0.00343888559159	0.00025953802232
k__Bacteria;p__Proteobacteria;c__Epsilonproteobacteria;o__Campylobacterales;f__Helicobacteraceae;g__Wolinella	0	0	0	0	0	0	0	0	0	0	0	0	0	0	0	0	0	0	0	0	0	0	0	0	0	0	0	0	0	0	0	0	0	0	0	0	0	0	0	0	0	0	0	0	0	1.68007929974e-05	5.77200577201e-05	0	0
k__Bacteria;p__Proteobacteria;c__Gammaproteobacteria;Other;Other;Other	0	0	0	0	0	0	0	0	0	0	0	0	0	0	0	0	0	0	0	0	0	0	0	0	0	0	0	0	0	0	0	0	0	0	0	0	0	0	0	0	0	0	0	0	0	0	0	0	0
k__Bacteria;p__Proteobacteria;c__Gammaproteobacteria;o__Aeromonadales;f__Aeromonadaceae;Other	0	0	0	0	0	0	0	0	0	0	0	0	0	0	0	0	0	0	0	0	0	0	0	0	0	0	0	0	0	0	0	0	0	0	0	0	0	0	0	0	0	0	0	0	0	0	0	0	0
k__Bacteria;p__Proteobacteria;c__Gammaproteobacteria;o__Aeromonadales;f__Aeromonadaceae;g__	0	0	0	0	0	0	0	0	0	0	0	0	0	0	0	0	0	0	0	0	0	0	0	0	0	0	0	0	0	0	0	0	0	0	0	0	0	0	0	0	0	0	0	0	0	0	0	0	0
k__Bacteria;p__Proteobacteria;c__Gammaproteobacteria;o__Aeromonadales;f__Aeromonadaceae;g__Aeromonas	0	0	0	0	0	0	0	0	0	0	0	0	0	0	0	0	0	0	0	0	0	0	0	0	0	0	0	0	0	0	0	0	0	0	0	0	0	0	0	0	0	0	0	0	0	0	0	0	0
k__Bacteria;p__Proteobacteria;c__Gammaproteobacteria;o__Alteromonadales;f__[Chromatiaceae];g__Rheinheimera	0	0	0	0	0	0	0	0	0	0	0	0	0	0	0	0	0	0	0	0	0	0	0	0	0	0	0	0	0	2.40401952064e-05	0	0	0	0	3.85193174377e-05	0	0	0	0	0	0	0	0	0	0	0	0	0	0
k__Bacteria;p__Proteobacteria;c__Gammaproteobacteria;o__Cardiobacteriales;f__Cardiobacteriaceae;Other	0	0	0	0	0	0	0	0	0	0	0	0	0	0	0	0	0	0	0	0	0	0	0	0	0	0	0	0	0	0	0	0	0	0	0	0	0	0	0	0	2.47880620693e-05	0	0	0	0	0	0	0	0
k__Bacteria;p__Proteobacteria;c__Gammaproteobacteria;o__Cardiobacteriales;f__Cardiobacteriaceae;g__	0	0	0	0	0	0	0	0	0	0	0	0	0	0	0	0	0	0	0	0	0	0	0	0	0	0	0	0	0	0	0	0	0	0	0	2.2928943205e-05	5.2306726645e-05	0	3.7853695467e-05	5.43734367637e-05	0	0	0	0	0	1.68007929974e-05	0	0	0
k__Bacteria;p__Proteobacteria;c__Gammaproteobacteria;o__Cardiobacteriales;f__Cardiobacteriaceae;g__Cardiobacterium	1.7134730385e-05	1.99409747148e-05	0	0	0	0	0	0	4.12099233495e-05	0	0.000116406691722	0	0	0	0	1.69857150137e-05	0	0	0	1.63792115048e-05	0	0	0	0	0	0.000169309780462	2.12666411467e-05	0	0	0	0	0	0	0	0	9.171577282e-05	0	0.000120041843157	0	1.81244789212e-05	0.000396608993109	1.86689069355e-05	0	0	0	0.000319215066951	0.00020202020202	0.00059351324931	0.000139751242788
k__Bacteria;p__Proteobacteria;c__Gammaproteobacteria;o__Chromatiales;Other;Other	0	0	0	0	0	0	0	0	0	0	0	0	0	0	0	0	0	0	0	0	0	0	0	0	0	0	0	0	0	0	0	0	0	0	0	0	0	0	0	0	0	0	0	0	0	0	0	0	0
k__Bacteria;p__Proteobacteria;c__Gammaproteobacteria;o__Enterobacteriales;f__Enterobacteriaceae;Other	0	0	0	0	0	0	0	0	0	0	0	0	0	0	0	0	0	0	0	0	0	0.0673951175552	0.0561035000123	0	1.96741953254e-05	0	0	0.000158962855679	0	0	0	0	0	0	0	0	0	0	0	0	0	0	0.000277546489037	0	0	0	0	8.72813601927e-05	0
k__Bacteria;p__Proteobacteria;c__Gammaproteobacteria;o__Enterobacteriales;f__Enterobacteriaceae;g__	0	0	0	0	0	0	0	0	0	0	0	0	0	0	0	0	0	0	0	0	0	6.43697397853e-05	2.45960105271e-05	0	0	0	0	0	0	0	0	0	0	0	0	0	0	0	0	0	0	0	0	0	0	0	0	0	0
k__Bacteria;p__Proteobacteria;c__Gammaproteobacteria;o__Enterobacteriales;f__Enterobacteriaceae;g__Citrobacter	0	0	0	0	0	0	0	0	0	0	0	0	0	0	0	0	0	0	0	0	0	0	0	0	0	0	0	0	0	0	0	0	0	0	0	0	0	0	0	0	0	0	0	0	0	0	0	0	0
k__Bacteria;p__Proteobacteria;c__Gammaproteobacteria;o__Enterobacteriales;f__Enterobacteriaceae;g__Enterobacter	0	0	0	0	0	0	0	0	0	0	0	0	0	0	0	0	0	0	0	0	0	0.163901	0.147084	0	0	0	0	0.000335588250879	0	0	0	0	0	0	0	9.171577282e-05	0	0	0	0	0	0	3.70061985383e-05	0	0	0	0	0	0
k__Bacteria;p__Proteobacteria;c__Gammaproteobacteria;o__Enterobacteriales;f__Enterobacteriaceae;g__Erwinia	0	0	0	0	0	0	0	0	0	0	0	0	0	0	0	0	0	0	0	0	0	1.60924349463e-05	0	0	0	0	0	0	0	0	0	0	0	0	0	0	0	0	0	0	0	0	0	0	0	0	0	0	0
k__Bacteria;p__Proteobacteria;c__Gammaproteobacteria;o__Enterobacteriales;f__Enterobacteriaceae;g__Escherichia	0	0	0	0	0	0	0	0	0	1.60264115262e-05	0	0	0	0	0	0	0	2.47157686604e-05	0	0	0	0.00017701678441	4.91920210542e-05	0	0	0	0	0	0	0	0	0	0	0	0	0	0	0	0	0	0	0	0	0	0	0	0	0	0
k__Bacteria;p__Proteobacteria;c__Gammaproteobacteria;o__Enterobacteriales;f__Enterobacteriaceae;g__Klebsiella	0	0	0	0	0	0	0	0	0	0	1.66295273888e-05	0	0	0	0	0	0	0	2.22642769676e-05	0	0	0.760126	0.78968	0	0	0	0	0.00233145521663	0	0	0	0	0	0	0	4.585788641e-05	0	0	0	0.000271867183818	0	0	3.70061985383e-05	0	0	0	0	0.000279300352617	0
k__Bacteria;p__Proteobacteria;c__Gammaproteobacteria;o__Enterobacteriales;f__Enterobacteriaceae;g__Salmonella	0	0	0	0	0	0	0	0	0	0	0	0	0	0	0	0	0	0	0	0	0	1.60924349463e-05	0	0	0	0	0	0	0	0	0	0	0	0	0	0	0	0	0	0	0	0	0	0	0	0	0	0	0
k__Bacteria;p__Proteobacteria;c__Gammaproteobacteria;o__Enterobacteriales;f__Enterobacteriaceae;g__Samsonia	0	0	0	0	0	0	0	0	0	0	0	0	0	0	0	0	0	0	0	0	0	0	0	0	0	0	0	0	0	0	0	0	0	0	0	0	0	0	0	0	0	0	0	0	0	0	0	0	0
k__Bacteria;p__Proteobacteria;c__Gammaproteobacteria;o__Enterobacteriales;f__Enterobacteriaceae;g__Serratia	0	0	0	0	0	0	0	0	0	0	0	0	0	0	0	0	0	0	0	0	0	0	0	0	0	0	0	0	0	0	0	0	0	0	0	0	0	0	0	0	0	0	0	0	0	0	0	0	0
k__Bacteria;p__Proteobacteria;c__Gammaproteobacteria;o__Enterobacteriales;f__Enterobacteriaceae;g__Trabulsiella	0	0	0	0	0	0	0	0	0	0	0	0	0	0	0	0	0	0	0	0	0	0.00102991583657	0.000885456378975	0	0	0	0	0	0	0	0	0	0	0	0	2.2928943205e-05	0	0	0	0	0	0	0	0	0	0	0	0	0
k__Bacteria;p__Proteobacteria;c__Gammaproteobacteria;o__Oceanospirillales;f__Halomonadaceae;g__Halomonas	1.7134730385e-05	1.99409747148e-05	0.0244120331708	0	0	2.19843032075e-05	0	0.000180517264015	0.00206049616748	0.000496818757312	0.000149665746499	4.04956669636e-05	0	0.000113675116517	0	3.39714300273e-05	0.0014493431203	0.000123578843302	0	9.82752690285e-05	0.0013066623649	0	0	4.79126074041e-05	0	0	0	0	0.000252978825672	0	4.07381757445e-05	5.87808844564e-05	0.000837317343273	0.000667053988337	0	0	0.00020922690658	0.000325827859997	0.00219551433709	9.06223946062e-05	0.0012146150414	1.86689069355e-05	9.25154963456e-05	5.44306553451e-05	0	3.36015859949e-05	0.00305916305916	0	0.00614905468266
k__Bacteria;p__Proteobacteria;c__Gammaproteobacteria;o__Pasteurellales;f__Pasteurellaceae;Other	1.7134730385e-05	0	0	3.60522757999e-05	0	0	0	0	0	0	0	0	0	0	3.94407304423e-05	0	0	4.94315373208e-05	4.45285539352e-05	1.63792115048e-05	0.000112921438942	0	0	0	0	0	0	3.53250790399e-05	0	0	0	0	0	0	0	0	0.000296404784322	0.000480167372627	0	0.00014499583137	4.95761241386e-05	0.00113880332307	0.00144324174299	0	0.00030946641475	0	0.0001443001443	0.000174562720385	0
k__Bacteria;p__Proteobacteria;c__Gammaproteobacteria;o__Pasteurellales;f__Pasteurellaceae;g__Actinobacillus	0	0	0	0	0	0	2.03911013234e-05	0	0	0	0	0	0	0	0	0	0	0	0	0	1.61316341345e-05	0	0	0	0	0	0	0	0	0	0	0	0	0	0	0	3.48711510967e-05	6.85953389467e-05	0	0	4.95761241386e-05	0.000130682348548	0.000148024794153	0	0	0	0.00025974025974	0.00012219390427	0
k__Bacteria;p__Proteobacteria;c__Gammaproteobacteria;o__Pasteurellales;f__Pasteurellaceae;g__Aggregatibacter	0.00257020955775	0	0	0	0	0	0	0	0	0	0	0	0	0	0.0125027115502	0.000373685730301	0	0.0137172516065	0.0213069	1.63792115048e-05	6.45265365382e-05	3.21848698927e-05	2.45960105271e-05	3.19417382694e-05	0	0.000338619560923	2.12666411467e-05	0.00012363777664	0	0	8.1476351489e-05	7.83745126085e-05	2.70102368798e-05	0	0	9.171577282e-05	0.0278446141507	0.0126043935315	0.000719220213873	0.0258092579838	0.00205740915175	0.00511528050033	0.000758627070034	0	0.000993550068408	0.00161287612775	0.00966810966811	0.00633662674999	3.99289265108e-05
k__Bacteria;p__Proteobacteria;c__Gammaproteobacteria;o__Pasteurellales;f__Pasteurellaceae;g__Haemophilus	1.7134730385e-05	0.00065805216559	0.000116525217999	0.0144209	0	0	0.00101955506617	0	0.000144234731723	0	0	0	0	0	1.97203652212e-05	0	0	0	2.22642769676e-05	0.00234222724518	0.0105662203581	0	2.45960105271e-05	3.19417382694e-05	0	0	2.12666411467e-05	0.00916685801084	0.000151787295403	0	8.1476351489e-05	0	0	0	0	0.000160502602435	0.0637618997803	0.0831375508034	3.7853695467e-05	0.0205169101388	0.0053294333449	0.246392	0.488389	1.81435517817e-05	0.0819108736726	0.00112565313083	0.0276767676768	0.0447055126907	1.99644632554e-05
k__Bacteria;p__Proteobacteria;c__Gammaproteobacteria;o__Pasteurellales;f__Pasteurellaceae;g__Lonepinella	0	0	0	0	0	0	0	0	0	0	0	0	0	0	0	0	0	0	0	0	0	0	0	0	0	0	0	0	0	0	0	0	0	0	0	0	0	0	0	0	0	0	0	0	0	0	0	0	0
k__Bacteria;p__Proteobacteria;c__Gammaproteobacteria;o__Pasteurellales;f__Pasteurellaceae;g__Necropsobacter	0	0	0	0	0	0	0	0	0	0	0	0	0	0	1.97203652212e-05	0	0	2.47157686604e-05	2.22642769676e-05	0	0	0	0	0	0	0	0	0	0	0	0	0	0	0	0	0	0	1.71488347367e-05	0	1.81244789212e-05	0	0	0	0	0	0	0	1.74562720385e-05	0
k__Bacteria;p__Proteobacteria;c__Gammaproteobacteria;o__Pasteurellales;f__Pasteurellaceae;g__Pasteurella	0	0	0	0	0	0	0	0	0	0	0	0	0	0	1.97203652212e-05	0	0	0	0	0	0	0	0	0	0	0	0	0	0	0	0	0	0	0	0	0	1.74355755483e-05	3.42976694734e-05	0	0	0	1.86689069355e-05	9.25154963456e-05	0	0	0	5.77200577201e-05	0	0
k__Bacteria;p__Proteobacteria;c__Gammaproteobacteria;o__Pseudomonadales;f__Moraxellaceae;g__Acinetobacter	0	0	0.00234992522965	0	0	0	0	0	0	0	0	2.02478334818e-05	0.000338473110192	0	0	1.69857150137e-05	0	0	0	0	0	0	0	0	0	0	0	0	7.58936477017e-05	0	0	0	0	6.45536117746e-05	1.92596587188e-05	0	0	0	0	0	0	0	0	0	0	1.68007929974e-05	0	0	0
k__Bacteria;p__Proteobacteria;c__Gammaproteobacteria;o__Pseudomonadales;f__Moraxellaceae;g__Enhydrobacter	0	0	0.000330154784331	0	0	0	0	0	0	0	0	0	0	0	0	0	0	0	0	0	0	0	0	0	0	0	0	0	2.52978825672e-05	0	0	0	0	4.30357411831e-05	0	0	0	0	0	0	0	0	0	0	0	0	0	0	0
k__Bacteria;p__Proteobacteria;c__Gammaproteobacteria;o__Pseudomonadales;f__Moraxellaceae;g__Moraxella	0	0	0	0	0	0	0	0	0	0	0	0	0	0	0	0	0	0	0	0	0	0	0	0	0	0	0	0	0	0	0	0	0	0	0	0	0	0	0	0	0	0	0	0	0	0	0	0	0
k__Bacteria;p__Proteobacteria;c__Gammaproteobacteria;o__Pseudomonadales;f__Pseudomonadaceae;g__Pseudomonas	0	0	3.88417393331e-05	0	0	0	0	0	0	1.60264115262e-05	0	0	0	0	0	0	0	0	0	0	0	0	0	0	0	0	0	0.000441563487998	2.52978825672e-05	0	0	0	0	0	1.92596587188e-05	0	0	0	0	0.000652481241164	0	0	0	0	0	0	0	0	0
k__Bacteria;p__Proteobacteria;c__Gammaproteobacteria;o__Vibrionales;f__Vibrionaceae;g__Photobacterium	0	0	0	0	0	0	0	0	0	0	0	0	0	0	0	0	0	0	0	0	0	0	0	0	0	0	0	0	0	0	0	0	0	0	0	0	0	0	0	0	0	0	0	0	0	0	0	0	0
k__Bacteria;p__Proteobacteria;c__Gammaproteobacteria;o__Vibrionales;f__Vibrionaceae;g__Vibrio	0	0	5.82626089996e-05	0	0	0	0	0	0	0	0	0	0	0	0	0	0	0	0	0	0	0	0	0	0	0	0	0	0	0	0	0	0	0	0	0	0	0	0	0	0	0	0	0	0	0	0	0	0
k__Bacteria;p__Proteobacteria;c__Gammaproteobacteria;o__Xanthomonadales;f__Sinobacteraceae;g__	0	0	0	0	0	0	0	0	0	0	0	0	0	0	0	0	0	0	0	0	0	0	0	0	0	0	0	0	0	0	0	0	0	0	0	0	0	0	0	0	0	0	0	0	0	0	0	0	0
k__Bacteria;p__Proteobacteria;c__Gammaproteobacteria;o__Xanthomonadales;f__Xanthomonadaceae;g__Stenotrophomonas	0	0	0	0	0	0	0	0	0	0	0	0	0	0	0	0	0	0	0	0	0	0	0	0	0	0	0	0	0	0	0	0	0	0	0	0	0	0	0	1.81244789212e-05	0	0	0	0	0	0	0	0	0
k__Bacteria;p__SR1;c__;o__;f__;g__	0	0	0	0	0	2.19843032075e-05	0	0	0	0	0	0	0	0	0	0	0	0	0	0	0	0	0	0	0	0	0	0	0	0	0	0	0	0	0	6.8786829615e-05	1.74355755483e-05	6.85953389467e-05	0	1.81244789212e-05	2.47880620693e-05	0	0	0	0	0	8.65800865801e-05	0	7.98578530216e-05
k__Bacteria;p__Spirochaetes;c__MVP-15;o__PL-11B10;f__;g__	0	0	0	0	0	0	0	0	0	0	0	0	0	0	0	0	0	0	0	0	0	0	0	0	0	0	0	0	0	0	0	0	0	0	0	0	0	0	0	0	0	0	0	0	0	0	0	0	0
k__Bacteria;p__Spirochaetes;c__Spirochaetes;o__Spirochaetales;f__Spirochaetaceae;g__Treponema	1.7134730385e-05	0	0	0	0	0	0	0	0	1.60264115262e-05	0	0	0	2.27350233034e-05	1.97203652212e-05	8.49285750684e-05	2.33765019402e-05	2.47157686604e-05	0	0	0	0	0	0	0	0	0	0	2.52978825672e-05	0	0	0	2.70102368798e-05	2.15178705915e-05	1.92596587188e-05	0.000573223580125	0.000191791331032	0.00046301853789	0.000283902716003	0.000108746873527	0.00188389271727	0.000410715952581	0.000610602275881	0.000145148414254	0.000700371359698	0.000285613480956	0.00118326118326	0.00106483259435	0.000778614066961
k__Bacteria;p__Synergistetes;c__Synergistia;o__Synergistales;f__Dethiosulfovibrionaceae;g__Pyramidobacter	0	0	0	0	0	0	0	0	0	0	0	0	0	0	0	0	0	0	0	0	0	0	0	0	0	0	0	0	0	0	0	0	0	0	0	0	0	0	1.89268477335e-05	0	0	0	0	0	0	3.36015859949e-05	0	0	0
k__Bacteria;p__Synergistetes;c__Synergistia;o__Synergistales;f__Dethiosulfovibrionaceae;g__TG5	0	0	0	0	0	0	0	0	0	0	0	0	0	0	1.97203652212e-05	1.69857150137e-05	0	2.47157686604e-05	0	0	0	0	0	0	0	0	0	0	0	0	0	1.95936281521e-05	0	0	0	9.171577282e-05	5.2306726645e-05	0.000188637182103	5.67805432005e-05	1.81244789212e-05	0.000743641862079	1.86689069355e-05	0.000185030992691	7.25742071268e-05	4.88631181184e-05	0.000100804757985	0.00034632034632	0.000209475264463	0.000319431412086
k__Bacteria;p__Synergistetes;c__Synergistia;o__Synergistales;f__Synergistaceae;g__	0	0	0	0	0	0	0	0	0	0	0	0	0	0	0	0	0	0	0	0	0	0	0	0	0	0	0	0	0	0	0	0	0	0	0	0	0	0	1.89268477335e-05	0	0	0	0	0	0	0	0	0	0
k__Bacteria;p__TM7;c__TM7-3;o__;f__;g__	0	0	3.88417393331e-05	0	0	0	0	0	4.12099233495e-05	0	1.66295273888e-05	0	0	0	0	1.69857150137e-05	0	7.41473059812e-05	0	0	0	0	0	1.59708691347e-05	1.96741953254e-05	2.82182967436e-05	0	0	0	2.40401952064e-05	0	0	0	0	0	9.171577282e-05	0.000226662482129	0.000137190677893	0.000113561086401	0.000398738536267	9.91522482772e-05	0	1.85030992691e-05	0	6.51508241579e-05	0.000117605550982	0.00023088023088	0.000802988513773	0.000299466948831
k__Bacteria;p__TM7;c__TM7-3;o__CW040;f__;g__	0	0	0	0	0	0	0	0	0	0	0	0	0	0	0	8.49285750684e-05	0	0	0	0	0	0	0	0	0	0	0	0	0	0	0	0	0	0	0	0	3.48711510967e-05	5.144650421e-05	0	0.000326240620582	0	0	3.70061985383e-05	0	0	0	0	0	0
k__Bacteria;p__TM7;c__TM7-3;o__CW040;f__F16;g__	0	0	0	0	0	0	0	0	0	0	0	0	0	0	0	0	0	0	0	0	0	0	0	0	0	0	0	0	0.000151787295403	0	0	0	0	0	0	0	0	0.000583060381047	0	0.000416863015188	0	1.86689069355e-05	0	0	8.14385301974e-05	1.68007929974e-05	2.886002886e-05	0.000349125440771	1.99644632554e-05
k__Bacteria;p__TM7;c__TM7-3;o__EW055;f__;g__	0	0	0	0	0	0	0	0	0	0	0	0	0	0	0	0	0	0	0	0	0	0	0	0	0	0	0	0	0	0	0	0	0	0	0	0	0	0	0	0	0	0	0	0	0	0	0	0	0
k__Bacteria;p__TM7;c__TM7-3;o__I025;f__Rs-045;g__	0	0	0	0	0	0	0	0	2.06049616748e-05	0	0	0	0	0	1.97203652212e-05	0	0	0	0	0	0	0	0	0	0	0	2.12666411467e-05	0	0	0	0	0	0	0	0	2.2928943205e-05	1.74355755483e-05	1.71488347367e-05	0	3.62489578425e-05	2.47880620693e-05	0	0	0	0	0	0.00011544011544	0.00012219390427	0.000119786779532
k__Bacteria;p__Tenericutes;c__Mollicutes;o__Acholeplasmatales;f__Acholeplasmataceae;g__Acholeplasma	0	0	0	0	0	0	0	0	0	0	0	0	0	0	0	0	0	0	0	0	0	0	0	0	0	0	0	0	0	0	0	0	0	0	0	0	0	0	0	0	0	0	0	0	0	1.68007929974e-05	0	0	0
k__Bacteria;p__Tenericutes;c__Mollicutes;o__Mycoplasmatales;f__Mycoplasmataceae;g__Mycoplasma	0	0	0	0	0	0	0	0	0	0	0	0	0	0	0	0	0	0	0	0	0	0	0	0	0	0	0	0	0	0	0	0	0	0	0	0	0	0	0	0	2.47880620693e-05	1.86689069355e-05	0	0	1.62877060395e-05	0	0	0	0
k__Bacteria;p__Tenericutes;c__Mollicutes;o__RF39;f__;g__	0	0	0	0	0	0	0	0	0	0	0	0	0	0	0	0	0	0	0	0	0	0	0	0	0	0	0	0	0	0	0	0	0	0	0	0	0	0	0	1.81244789212e-05	0	0	0	0	1.62877060395e-05	0	0	0	0
k__Bacteria;p__Tenericutes;c__RF3;o__ML615J-28;f__;g__	0	0	0	0	0	0	0	0	0	0	0	0	0	0	0	0	0	0	0	0	0	0	0	0	0	0	0	0	0	0	0	0	0	0	0	0	0	0	1.89268477335e-05	0	0	0	0	0	0	0	2.886002886e-05	1.74562720385e-05	0
k__Bacteria;p__Verrucomicrobia;c__Verrucomicrobiae;o__Verrucomicrobiales;f__Verrucomicrobiaceae;g__Akkermansia	0	0	0	0	0	0	0	0	0	0	0	0	0	0	0	0	0	0	0	0	0	0	0	0	0	0	0	0	0	0	0	0	0	0	0	0	0	0	0	0	0	0	0	0	0	0	0	0	0
k__Bacteria;p__[Thermi];c__Deinococci;o__Deinococcales;f__Deinococcaceae;g__Deinococcus	0	0	0	0	0	0	0	0	0	0	0	0	0	0	0	0	0	0	0	0	0	0	0	0	0	0	0	0	0	0	0	0	0	2.15178705915e-05	0	0	0	0	0	0	0	0	0	0	0	0	0	0	0
[truncated: 36 more columns]
